# Supplementary material
Source: publisher site journal article supplement (https://www.degruyterbrill.com/publication/isbn/9783111026411/downloadAsset/9783111026411_L%C3%B6sungsvorschl%C3%A4ge%20Studienbuch%20Sprachbildung.pdf)
Supplement: Supplementary file 1 [file 9783111026411_L%C3%B6sungsvorschl%C3%A4ge%20Studienbuch%20Sprachbildung.pdf]

Diana Maak, Inger Petersen

# Sprachbildung in allen Schulfächern der Sekundarstufe: Lösungsvorschläge

*Lösungsvorschläge zum Band Sprachbildung in allen Fächern –  
Grundlagen, Konzepte und Methoden der germanistischen Linguistik  
und Sprachdidaktik – unter Mitarbeit von Inga-Sophie Jacobsen, Cara  
Kropp, Bettina Pannek, Eileen Pleiß & Geeske Strecker; Reihe  
Germanistische Arbeitshefte, herausgegeben von Thomas Gloning und  
Jörg Kilian, Band 52. Berlin, Boston: De Gruyter.*

Diana Maak und Inger Petersen

2.12.2025

## Inhaltsverzeichnis

|                                                                                                                 |           |
|-----------------------------------------------------------------------------------------------------------------|-----------|
| <b>1. Sprachbildung und ihre Didaktik .....</b>                                                                 | <b>1</b>  |
| <b>2. Deutsch als Alltags-, Bildungs- und Fachsprache .....</b>                                                 | <b>3</b>  |
| <b>3. Schulgrammatisches Grundlagenwissen für sprachbildenden Unterricht .....</b>                              | <b>6</b>  |
| <b>4. Funktion und Herausforderung von Sprache im Kontext der Wissensvermittlung .....</b>                      | <b>10</b> |
| <b>5. Mehrsprachigkeit in Schule und Unterricht .....</b>                                                       | <b>15</b> |
| <b>6. Sprachen und Macht im schulischen Kontext .....</b>                                                       | <b>18</b> |
| <b>7. Neu zugewanderte Schüler*innen im Regelunterricht .....</b>                                               | <b>21</b> |
| <b>8. Bedarfsanalyse: Sprachliche Anforderungen des Unterrichts .....</b>                                       | <b>25</b> |
| <b>9. Erfassung aufgabenbezogener Sprachkompetenz im Fachunterricht: Formative sprachliche Diagnostik .....</b> | <b>28</b> |
| <b>10. Sprachbildendes Handeln in der Unterrichtsaktion .....</b>                                               | <b>33</b> |
| <b>11. Wortschatzarbeit in allen Unterrichtsfächern .....</b>                                                   | <b>37</b> |
| <b>12. Sprechen und Zuhören in allen Unterrichtsfächern .....</b>                                               | <b>43</b> |
| <b>13. Lesen in allen Unterrichtsfächern .....</b>                                                              | <b>48</b> |
| <b>14. Bildliche Darstellungen im Fachunterricht .....</b>                                                      | <b>51</b> |
| <b>15. Schreiben in allen Unterrichtsfächern .....</b>                                                          | <b>54</b> |
| <b>16. Lehr-/Lernmaterialien für die Sprachbildung .....</b>                                                    | <b>66</b> |
| <b>17. Literaturangaben .....</b>                                                                               | <b>68</b> |

## 1. Sprachbildung und ihre Didaktik

### Aufgaben vor dem Lesen

1. *Was wissen Sie bereits zum Thema Sprachbildung? Ergänzen Sie die nachfolgend abgebildete Mindmap. Erweitern Sie diese auch gerne während der Lektüre des Kapitels.*

Für diese Aufgabe gibt es zahlreiche individuelle Lösungen und kein Richtig oder Falsch, daher ist hier kein Lösungsvorschlag abgebildet.

### Aufgaben nach dem Lesen

1. *Falls noch nicht während es Lesens geschehen: Lesen Sie noch einmal Ihre Mindmap durch und ergänzen Sie diese ggf. Gibt es Fragen, die der Text nicht beantwortet hat bzw. Fragen, die sich durch die Lektüre ergeben haben? Falls möglich, dann besprechen Sie diese in (universitären) Veranstaltungen oder mit Kommiliton\*innen bzw. Kolleg\*innen.*

Für diese Aufgabe gibt es zahlreiche individuelle Lösungen. Zu erwarten wäre, dass Sie z.B. Termini wie Sprachförderung (in Abgrenzung zu Sprachbildung) in der Mindmap ergänzt haben und vermutlich auch weitere Notizen zur Definition. Idealerweise können Sie sich über Ihre Mindmap mit Kommiliton\*innen und/oder Kolleg\*innen austauschen, ggf. auch im Rahmen von universitären Seminarsitzungen.

2. *Sprachbildung, Sprachförderung oder Hinweise auf den geheimen Lehrplan Sprache? Welche Zuordnung ist in Anlehnung an die im Kapitel präsentierten Definitionen im Kapitel für die nachfolgenden Fallbeispiele jeweils passend?*

- a) Passend ist der geheime Lehrplan Sprache. Die Lehrerin stellt Anforderungen an die Schüler\*innen, bei denen es ihr schwer fällt explizite Hinweise zu geben. Es geht hier u.a. um das Thema Origo-Exklusivität (vgl. Ausführungen im Kapitel zu Funktionen und Herausforderungen von Sprache im Kontext der Wissensvermittlung) – demnach soll bei Protokollen i.d.R. das Passiv (Das *wird* in den Glaszylinder *gefüllt*.) oder es sollen Passiversatzformen wie z.B. *man* verwendet werden.
- b) Passend ist Sprachbildung; konkret geht es um die Dimension Einbeziehung von Eltern und weiteren außerschulischen Partner\*innen und auch die Dimension Beziehungen zwischen den Sprachen und unterschiedlichen Sprachebenen spielt eine Rolle (vgl. Heintze 2010 und Ausführungen dazu im Kapitel). Zu Sprachbildung gehört nicht ausschließlich sprachbildender Unterricht in der deutschen Sprache, sondern die Unterstützung der Entwicklung der individuellen Mehrsprachigkeit von Schüler\*innen.

Maak, Diana/ Petersen, Inger (2025): Sprachbildung in allen Schulfächern der Sekundarstufe. Grundlagen, Konzepte und Methoden der germanistischen Linguistik und Sprachdidaktik. De Gruyter.

- c) Passend ist Sprachbildung; dargestellt ist im Beispiel der Kern von Sprachbildung, die Verbindung von Sprach- und Fachlernen in allen Fächern. Da Mathematikaufgaben nicht mit Lesestrategien des Deutschunterrichts erschlossen werden können, braucht es sprachbildenden Unterricht in Mathematik (vgl. auch Ausführungen im Kapitel Lesen zum Thema Textaufgaben).
- d) Passend ist Sprachbildung; konkret geht es um die Dimension Einbeziehung von Eltern und weiteren außerschulischen Partner\*innen und auch die Dimension Beziehungen zwischen den Sprachen und unterschiedlichen Sprachebenen spielt eine Rolle (vgl. Heintze 2010 und Ausführungen dazu im Kapitel).
- e) Der DaZ-Unterricht stellt hier eine konkrete Form von Sprachförderung dar. An dieser Stelle ist darauf hinzuweisen, dass Sprachförderung durchaus Teil des Sprachbildungskonzepts einer Schule sein kann bzw. vermutlich sogar sein sollte.

## 2. Deutsch als Alltags-, Bildungs- und Fachsprache

### Aufgaben vor dem Lesen

1. *Lesen Sie die Textaufgabe sowie den Lösungsvorschlag eines Schülers. Warum entscheidet sich der Schüler für einen falschen Lösungsweg?*

Der Schüler hat Schwierigkeiten, das Wort *zurücklegen* zu verstehen. Da er nicht erkennt, dass die Bedeutung hier „(eine Wegstrecke) gehend, fahrend usw. hinter sich lassen, bewältigen“ (duden.de) ist, sondern stattdessen davon ausgeht, dass *zurücklegen* die Hin- und Rückfahrt beinhaltet, kann er die Aufgabe nicht korrekt lösen. Gleichzeitig scheint er keine Probleme mit den mathematischen Operationen zu haben.

2. *Nachfolgend finden Sie im ersten Text eine Abschrift eines Gesprächs von drei Schüler\*innen, die ein Experiment durchführen. Um was für ein Experiment handelt es sich? Woran erkennen Sie das bzw. warum können Sie das vielleicht nicht direkt erkennen?*

Es gibt zahlreiche individuelle Lösungen. Nachfolgend finden Sie zur Orientierung ein Beispiel.

Ich könnte mir vorstellen, dass es um Magnetismus geht und die Schüler\*innen testen verschiedene Gegenstände bzw. Materialien daraufhin, ob sie von einem Magneten angezogen werden oder nicht. Da die Schüler\*innen jedoch nicht in vollständigen Sätzen und mit nicht eindeutigen Bezügen (*das, es*) sprechen, ist es relativ schwierig, zu erkennen, worum es genau geht. Das liegt auch daran, dass man in der Situation nicht dabei ist.

3. *In Text 2 wird das Experiment aus Text 1 schriftlich beschrieben. Vergleichen Sie die beiden Texte. Welche sprachlichen Gemeinsamkeiten und welche Unterschiede können Sie identifizieren?*

#### Text 2

- Sprachlich komplexer durch komplexere Syntax (Nebensätze ... *herausfinden, was ein Magnet anzieht; Dinge, die kein Metall waren; Wir entdeckten, dass...*)
- Explizite Rahmung bzw. Kontextualisierung (*Mit unserem Experiment...*)
- Explizite Nennung der Gegenstände, die im Experiment verwendet wurden (Eisenspäne, Stecknadel)
- Verwendung von semantisch passenderem Verb (*anziehen* statt *es geht (nicht)*)
- Zusammenfassung der Beobachtung
- ...

## Aufgaben nach dem Lesen

1. *Gehen Sie noch einmal zu Aufgabe 1.) zurück: Liegt die Ursache für die falsche Lösung eher in Schwierigkeiten mit der Alltags-, Bildungs- oder Fachsprache?*

Eine Strecke *zurücklegen* würde man eher als bildungssprachlich einordnen. Es handelt sich um ein eher niedrig-frequentes, also selten verwendetes, Verb. Oder können Sie sich spontan erinnern, wann Sie das Verb das letzte Mal mündlich/schriftlich in dieser Bedeutung verwendet haben? Vermutlich haben Sie eher etwas an seinen Platz zurück gelegt. *Zurücklegen* ist nicht als fachsprachlich einzuordnen.

2. *Gehen Sie noch einmal zu Aufgabe 2.) und 3.) zurück – würden Sie Text 1 und Text 2 als eher alltags-, bildungs- oder fachsprachlich einordnen? Woran würden Sie das festmachen?*

Text 1 ist als alltagssprachlich einzuordnen. Text 2 ist bildungssprachlich und verwendet fach- bzw. themenspezifischen Wortschatz (*anziehen*).

3. *Lesen Sie die nachfolgenden Aussagen und beziehen Sie Stellung.*

- a) Es gibt keine Hierarchie im Sinne von besser/schlechter. Sprache wird funktional verwendet und je nach Kontext und Kommunikationsziel verwenden wir unterschiedliche Varietäten. Weder die Bildungssprache noch die Fachsprache ist besser oder wichtiger als die Alltagssprache.
- b) Tatsächlich zeigen Untersuchungen, dass Lehrer\*innen im Unterricht unterschiedliche Varietäten verwenden und häufig bewusst zwischen diesen wechseln. Auch sie verwenden also Alltags-/Umgangssprache. Zu erwarten wäre aber (auch dies belegen erste Untersuchungen, z.B. von Katrin Kleinschmidt-Schinke), dass Lehrer\*innen mit zunehmender Klassenstufe verstärkt als Vorbild für bildungs- oder fachsprachliches Handeln dienen und dementsprechend diese Varietäten eine große Rolle spielen – eine größere auf jeden Fall als z.B. auf dem Pausenhof.
- c) Auch wenn es nicht Ziel von schulischem Unterricht ist, Fachleute auszubilden, sollten Schüler\*innen selbstverständlich bereits in der Schule exemplarisch mit fachspezifischen Denk- und Handlungsmustern vertraut gemacht werden; dazu gehört auch fachsprachliches Agieren – z.B. die Verwendung von passenden Fachbegriffen oder das Anfertigen von fachspezifischen Textsorten (z.B. Versuchsprotokolle).

4. Ordnen Sie folgende Tätigkeiten im Raster Konzept/Medium ein.

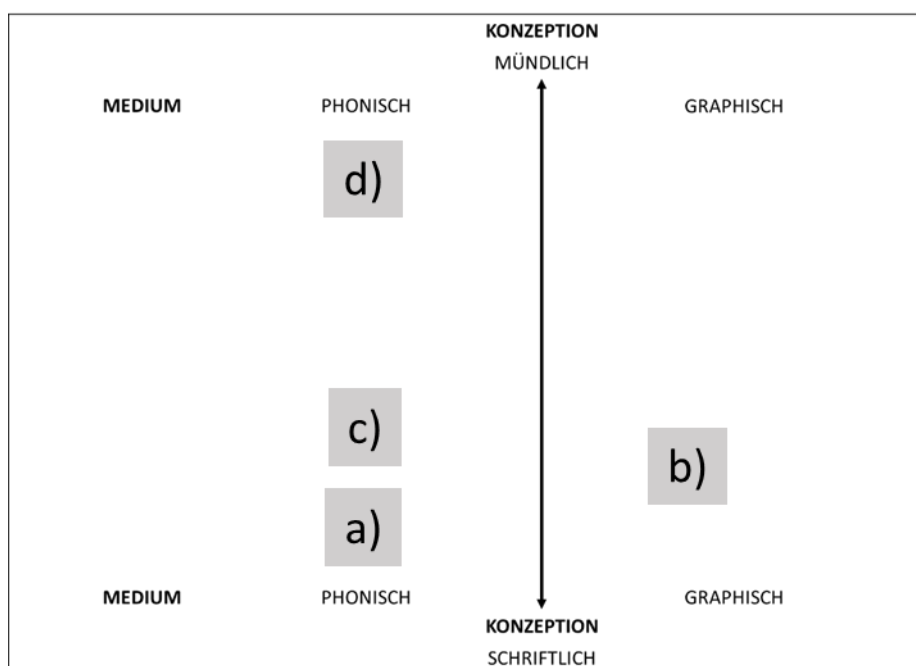

### 3. Schulgrammatisches Grundlagenwissen für sprachbildenden Unterricht

#### Aufgaben vor dem Lesen

1. Lesen Sie das Beispiel. Die Satzstellung ist ungewöhnlich (vgl. Unterstreichung). Wie würde man das eher schreiben? Kennen Sie die entsprechenden Regeln?

Satz mit korrekter Wortstellung: Der Mensch hat dann fest an dem Gummi gezogen, und die Luftballons haben sich leicht aufgebläht.

Regel: Unterschiedliche adverbiale Angaben werden normalerweise in einer bestimmten Reihenfolge im Mittelfeld des Satzes integriert. Deutschlernenden wird i.d.R. die Merkhilfe „TEKAMOLO“ nahe gebracht → TE (Temporal), KA (Kausal), MO (Modal), LO (Lokal). Daher ist die korrekte Reihenfolge im Beispielsatz 1.) dann (temporal), 2.) fest (modal). Eine lokale Angabe ist in dem Beispiel nicht vorhanden. Bei „an dem Gummi“ handelt es sich jedoch um ein Präpositionalobjekt, das normalerweise am Ende des Mittelfelds steht.

2. Lesen Sie die folgende Textaufgabe aus dem Mathematikunterricht und das Transkript eines Gesprächs zwischen Schüler\*innen einer fünften Klasse und ihrem Förderlehrer. Stellen Sie Vermutungen darüber an, warum der Satz „Ihrem Bruder Jonas gibt sie 1 € ab“ von der Schülerin Pinar missverstanden wird.

In dem Satz „Ihrem Bruder Jonas gibt sie 1 € ab.“ ist *Ihrem Bruder Jonas* das Dativobjekt und *sie* das Subjekt. Pinar interpretiert jedoch die zuerst genannte Person im Satz (*Ihrem Bruder Jonas*) als das Subjekt und die zweitgenannte Person (*sie*) als Objekt. Das könnte daran liegen, dass in der deutschen Sprache normalerweise das Subjekt vor dem Objekt steht. Pinars Äußerungen in Zeile 3 und 13 zeigen, dass sie die Endung des Pronomens *ihrem* überliest (*ihr statt ihrem*). Die Endung -em markiert den Dativ. Eine mögliche Ursache für diese fehlerhafte Interpretation der durch die Pronomen ausgedrückten Bezüge zwischen Subjekt und Objekt könnten Unterschiede in den Satzstellungen verschiedener Sprachen sein (vgl. Dröse 2019: 52).

3. Sehen Sie sich die Termini in der Übersicht an – alle kommen im nachfolgenden Kapitel vor. Notieren Sie, was Ihnen dazu einfällt.

Bitte beachten Sie, dass es zahlreiche individuelle Lösungen gibt, die sich möglichst an den Ausführungen aus dem Kapitel orientieren und um weitere Beispiele etc. ergänzt werden sollten. Der nachfolgende Lösungsvorschlag dient also lediglich zur Orientierung.

| Terminus     | Definition, Beispiel und weitere Notizen                                                                                  |
|--------------|---------------------------------------------------------------------------------------------------------------------------|
| die Syntax   | Die Syntax ist der Bau von Sätzen und Wortgruppen.<br>Zum Beispiel: Satzstruktur: Subjekt - Prädikat - Objekt (S - P - O) |
| die Semantik | Die Semantik meint die Bedeutung sprachlicher Zeichen.                                                                    |



|                    |                                                                                                                                                                                                                                                                                                                                                                                                                         |
|--------------------|-------------------------------------------------------------------------------------------------------------------------------------------------------------------------------------------------------------------------------------------------------------------------------------------------------------------------------------------------------------------------------------------------------------------------|
|                    | Zum Beispiel: Die Bank (Finanzinstitut oder Sitzgelegenheit)                                                                                                                                                                                                                                                                                                                                                            |
| die Wortart        | Wortarten sind Klassen von Wörtern, die bestimmte Merkmale gemeinsam haben, z.B. hinsichtlich ihrer Bedeutung (semantisch), ihrer Form (morphologisch) oder ihrer Position im Satz (syntaktisch).<br>Zum Beispiel: Substantiv/Nomen, Adjektiv, Adverb, Präposition                                                                                                                                                      |
| das Substantiv     | Das Substantiv ist eine Wortart. Das Substantiv ist ein Wort, das auf "Dinge" oder Sachverhalte (o. Ä.) verweist.<br>Zum Beispiel: Tisch, Geschehen, Medien                                                                                                                                                                                                                                                             |
| die Präposition    | Eine Präposition ist eine Wortart. Präpositionen stellen eine spezifische inhaltliche Beziehung zwischen Gegenständen oder Sachverhalten dar.<br>Zum Beispiel: <i>an, mit, auf, bei</i>                                                                                                                                                                                                                                 |
| das Prädikat       | Das Prädikat zählt zu den Satzgliedern. Das Prädikat gibt an, was über das Subjekt ausgesagt wird.<br>Zum Beispiel: Kinder <i>singen</i> laut.                                                                                                                                                                                                                                                                          |
| das Temporaladverb | Ein Temporaladverb beschreibt die zeitlichen Umstände, unter denen etwas geschieht (z.B. Zeit, Dauer oder Häufigkeit).<br>Zum Beispiel: <i>zunächst, durchgängig, morgens</i>                                                                                                                                                                                                                                           |
| die Flexion        | Bei der Flexion ändert sich in Abhängigkeit des Äußerungskontexts die Form des Wortes, so dass die Wörter unterschiedliche grammatische Informationen enthalten. Man unterscheidet grob zwischen der <i>Konjugation</i> (Flexion der Verben), der <i>Deklination</i> (Flexion von Nominalgruppen) und der <i>Komparation</i> , auch <i>Steigerung</i> genannt, (bei Adjektiven, z.B. <i>groß, größer, am größten</i> ). |
| die Komposition    | Die Komposition bezeichnet die Bildung eines Wortes, welches aus einzelnen Wörtern zusammengesetzt wird. Beispiel: <i>Haus + Tür = Haustür</i> . Mit ihrer Hilfe lassen sich Inhalte verdichten, präzisieren und differenzieren.                                                                                                                                                                                        |
| der Nebensatz      | Ein Nebensatz ist grammatisch abhängig von einem Hauptsatz und kann nicht alleine stehen. Er wird durch eine Konjunktion eingeleitet und das finite Verb steht am Ende des Satzes.<br>Beispiel: Ich gehe gerne spazieren, <u>weil ich gerne an der frischen Luft bin.</u>                                                                                                                                               |

## Aufgaben nach dem Lesen

1. *Nachfolgend finden Sie sechs Fragen und Äußerungen von Deutschlernenden, die aufzeigen, wie ‚merkwürdig‘ die deutsche Sprache ist – können Sie die sechs Fragen den verschiedenen sprachlichen Ebenen a-f zuordnen?*

|    |                   |
|----|-------------------|
| 1. | e) Phonetik       |
| 2. | c) hier: Semantik |
| 3. | b) Morphologie    |
| 4. | d) Syntax         |
| 5. | f) Graphematik    |
| 6. | a) Pragmatik      |

2. *Bitte bestimmen Sie die Wortart der unterstrichenen Wörter in dem Text unten.*

|                       |             |
|-----------------------|-------------|
| <u>verfolgen</u> :    | Verb        |
| <u>Gesellschaft</u> : | Nomen       |
| <u>direkten</u> :     | Adjektiv    |
| <u>dass</u> :         | Konjunktion |

3. *Bestimmen Sie in dem Text unten die Attribute (Adjektiv-/Präpositional- oder Genitivattribut) der kursiv gesetzten Nominalphrasen.*

|                                            |                                                                                                                                                       |
|--------------------------------------------|-------------------------------------------------------------------------------------------------------------------------------------------------------|
| <i>eine bedeutsame Rolle</i> :             | Nominalphrase mit Adjektivattribut                                                                                                                    |
| <i>Fragen von öffentlichem Interesse</i> : | Nominalphrase mit Präpositionalattribut. Das Präpositionalattribut „von öffentlichem Interesse“ enthält wiederum das Adjektivattribut „öffentlichem“. |
| <i>Kampf der Meinungen</i> :               | Nominalphrase mit Genitivattribut                                                                                                                     |

4. *Bitte ordnen Sie die folgenden Sätze in das Feldermodell bzw. die Tabelle unten ein:*

Maak, Diana/ Petersen, Inger (2025): Sprachbildung in allen Schulfächern der Sekundarstufe. Grundlagen, Konzepte und Methoden der germanistischen Linguistik und Sprachdidaktik. De Gruyter.

|   | <b>Verbstellung</b>      | <b>Vorfeld</b>     | <b>Linke Satzklammer</b> | <b>Mittelfeld</b>                        | <b>Rechte Satzklammer</b> |
|---|--------------------------|--------------------|--------------------------|------------------------------------------|---------------------------|
| 1 | <i>Verberstellung</i>    |                    | Bestehen                 | Atome aus Protonen?                      |                           |
| 2 | <i>Verbzweitstellung</i> | Im Kunstunterricht | können                   | Schüler*innen ihre kreativen Fähigkeiten | entfalten.                |
| 3 | <i>Verberstellung</i>    |                    | Melde                    | dich!                                    |                           |
| 4 | <i>Verberstellung</i>    |                    | Werden                   | die binomischen Formeln im Unterricht    | behandelt,                |
| 5 | <i>Verbzweitstellung</i> | dann               | entstehen                | viele Fragen.                            |                           |
| 6 | <i>Verbzweitstellung</i> | Der Englischlehrer | wird                     | den Vokalbeltest erst am Montag          | zurückgeben,              |
| 7 | <i>Verbletzstellung</i>  |                    | damit                    | er mehr Zeit für die Korrektur           | hat.                      |

## 4. Funktion und Herausforderung von Sprache im Kontext der Wissensvermittlung

### Aufgaben vor dem Lesen

1. Bitte stellen Sie sich folgende Situation vor: Sie besuchen eine Vorlesung zum Thema Sprachbildung. Nach drei Wochen sind die Powerpointpräsentationen zur Vorlesung noch immer nicht auf Ihrer digitalen Lernplattform eingestellt. Sie möchten die Vorlesung gerne nachbereiten und kontaktieren daher die Professorin:

Bitte beachten Sie, dass für diese Aufgabe selbstverständlich zahlreiche individuelle Lösungen möglich sind. Nachfolgend finden Sie einen Lösungsvorschlag, der zur Orientierung dienen kann. Weitere Beispiele für (un-)freundliche Mails und Kommentierungen dazu finden sich außerdem im Laufe des Studienbuchkapitels.

- a) Schreiben Sie zwei E-Mail-Versionen: Formulieren Sie eine Mail, die so höflich wie möglich ist und in der Sie nicht zu fordernd klingen. Formulieren Sie eine weitere Mail, die möglichst kurz ist. Es ist auch in Ordnung, wenn sie unhöflich klingt.

| Mail 1                                                                                                                                                                                                                                                                                                                                                                                                                                                                                                                                                                                                                                                                                                                                                                                                                                                  | Mail 2                                                                                                                                                                                            |
|---------------------------------------------------------------------------------------------------------------------------------------------------------------------------------------------------------------------------------------------------------------------------------------------------------------------------------------------------------------------------------------------------------------------------------------------------------------------------------------------------------------------------------------------------------------------------------------------------------------------------------------------------------------------------------------------------------------------------------------------------------------------------------------------------------------------------------------------------------|---------------------------------------------------------------------------------------------------------------------------------------------------------------------------------------------------|
| <p>Betreff: Anfrage zu den Powerpointpräsentationen der letzten Vorlesungen der Sprachbildung [Lehrveranstaltungsnummer]</p> <p>Sehr geehrte Frau Professorin [Nachname],</p> <p>Mein Name ist [Name] und ich besuche Ihre Vorlesung zum Thema Sprachbildung in diesem Semester. Zunächst möchte ich mich für die interessante Vorlesung bedanken.</p> <p>In Vorbereitung auf die kommende Prüfungsphase wollte ich gerne die Powerpointpräsentationen der letzten drei Wochen nacharbeiten. Leider konnte ich bisher keine entsprechenden Unterlagen auf der digitalen Lernplattform finden. Es wäre für mich sehr hilfreich, wenn Sie diese zur Verfügung stellen könnten, sobald es Ihnen möglich ist.</p> <p>Vielen Dank im Voraus für Ihre Unterstützung und Mühe.</p> <p>Mit freundlichen Grüßen</p> <p>[Name Nachname]<br/>[Matrikel-Nummer]</p> | <p>Betreff: PPP</p> <p>Hallo Frau [Nachname],</p> <p>wo sind die Powerpoints von den letzten Vorlesungen - ich finde sie nicht auf der Lernplattform. Bitte hochladen!</p> <p>[Name Nachname]</p> |

b) Vergleichen Sie die beiden Mails. Was unterscheidet sie auf sprachlicher und was auf inhaltlicher Ebene?

| Unterschiede sprachliche Ebene                                                                                                                                                                                                                                                                                                                                                                                                                                                                                                                                                                                                                                                                                                                                                                                                                                                                                                                                                                           | Unterschiede inhaltliche Ebene                                                                                                                                                                                                                                                                                                                                                                                                       |
|----------------------------------------------------------------------------------------------------------------------------------------------------------------------------------------------------------------------------------------------------------------------------------------------------------------------------------------------------------------------------------------------------------------------------------------------------------------------------------------------------------------------------------------------------------------------------------------------------------------------------------------------------------------------------------------------------------------------------------------------------------------------------------------------------------------------------------------------------------------------------------------------------------------------------------------------------------------------------------------------------------|--------------------------------------------------------------------------------------------------------------------------------------------------------------------------------------------------------------------------------------------------------------------------------------------------------------------------------------------------------------------------------------------------------------------------------------|
| <p>Mail 1:</p> <ul style="list-style-type: none"> <li>- standardisierte Höflichkeitsformen (z.B. höfliche Anrede, freundliche Grußformel) und formelhafte Wendungen (z.B. <i>Vielen Dank im Voraus...</i>)</li> <li>- Verwendung des Konjunktivs (<i>es <u>wäre</u> für mich sehr hilfreich</i>)</li> <li>- abschwächende sowie ausschmückende bzw. näher beschreibende Adverbien (<i><u>Leider</u> konnte ich bisher..., wollte ich <u>gerne</u> die Powerpointpräsentationen</i>)</li> <li>- Keine Formulierung von Fragen, sondern einer indirekt formulierten Aufforderung bzw. Bitte (<i>Es wäre für mich sehr hilfreich, wenn Sie diese zur Verfügung stellen könnten, sobald es Ihnen möglich ist.</i>)</li> <li>- Komplexe Syntax, auch durch komplexe Nominalphrasen (<i>In Vorbereitung auf die kommende Prüfungsphase</i>) u.a. mit Nominalisierungen (<i>Vorbereitung</i>)</li> <li>- Textlänge (länger) → ergibt sich u.a. aus zusätzlichen Erklärungen (vgl. inhaltliche Ebene)</li> </ul> | <p>Mail 1:</p> <ul style="list-style-type: none"> <li>- Thema der Mail wird bereits im Betreff sehr deutlich</li> <li>- Kontextualisierung für Adressatin (Name, konkrete Veranstaltung, auf die sich die Anfrage bezieht etc.)</li> <li>- Erklärung Anlass zur Anfrage</li> <li>- indirekt formulierte Bitte, die Powerpointpräsentationen auf der Lernplattform hochzuladen</li> <li>- Ausdruck der Dankbarkeit (vorab)</li> </ul> |
| <p>Mail 2:</p> <ul style="list-style-type: none"> <li>- Keine formelhaften Wendungen (z.B. Anrede ohne Titel der Professorin, keine freundliche Grußformel, das <i>Bitte</i> kann nur bedingt als freundlich interpretiert werden)</li> <li>- Verwendung des Indikativs</li> <li>- Formulierung von direkter Frage (<i>Wo sind...?</i>) und Aufforderungen (<i>Bitte hochladen!</i>)</li> <li>- Textlänge (wesentlich kürzer als Mail 1)</li> </ul>                                                                                                                                                                                                                                                                                                                                                                                                                                                                                                                                                      | <p>Mail 2:</p> <ul style="list-style-type: none"> <li>- Verlangen nach der Powerpointpräsentation</li> <li>- kaum Kontextinformationen (<i>von den letzten Vorlesungen</i>) – es wird davon ausgegangen, dass klar ist, um welche Vorlesungen es sich handelt</li> <li>- keine nähere Begründung für die Anfrage</li> <li>- keine Formulierung der Dankbarkeit</li> </ul>                                                            |

2. Lesen Sie sich die Aufgaben a) bis c) durch. Wie würden Sie den Schwierigkeitsgrad der Aufgaben ordnen? Welche Aufgabe ist am leichtesten formuliert, welche am schwierigsten? Woran erkennen Sie das?

Maak, Diana/ Petersen, Inger (2025): Sprachbildung in allen Schulfächern der Sekundarstufe. Grundlagen, Konzepte und Methoden der germanistischen Linguistik und Sprachdidaktik. De Gruyter.

Die Lösung sowie eine ausführliche Kommentierung dazu findet sich im Studienbuchkapitel.

3. Lesen Sie den nachfolgenden Auszug aus einem Schulbuchtext im Fach Geschichte über das Ende des Ersten Weltkrieges und notieren Sie zwei bis drei Aspekte, die das Verstehen für Schüler\*innen erschweren könnten.

Hinweise auf mögliche Herausforderungen finden sich im Studienbuchkapitel – idealerweise konnten Sie beim Lesen des Kapitels Ihre Notizen abgleichen.

## Aufgaben nach dem Lesen

1. „Ein Schwimmbecken, das  $780 \text{ m}^3$  Wasser fasst, kann in  $4 \frac{1}{3}$  Stunden gefüllt werden. Der Ablauf des gesamten Wassers dauert  $3 \frac{1}{3}$  Stunden. Berechne, wie viel  $\text{m}^3$  Wasser pro Stunde zufließen und wie viel abfließen.“

Bitte versuchen Sie zunächst, die obige Textaufgabe zu lösen (Mathematik, 6. Klasse). Analysieren Sie diese im Anschluss nach den Prinzipien zur Erfassung sprachlicher Schwierigkeit nach Heine et al. (2018). Geben Sie für jedes Prinzip ein Beispiel und erläutern Sie dieses knapp.

Lösung der Mathematikaufgabe:

$$780 \text{ m}^3 : 4 \frac{1}{3} = 780 : \frac{13}{3} = \frac{780 \cdot 3}{13} = 180 \text{ m}^3 \text{ fließen pro Stunde zu.}$$

$$780 \text{ m}^3 : 3 \frac{1}{3} = 780 : \frac{10}{3} = \frac{780 \cdot 3}{10} = 234 \text{ m}^3 \text{ fließen pro Stunde ab.}$$

1

Nachfolgend finden Sie einen Lösungsvorschlag, der zur Orientierung dienen soll. Weitere Lösungen sind möglich.

| Prinzip                  | Beispiel aus der Textaufgabe                                                        | Erläuterung                                                                                                                                                      |
|--------------------------|-------------------------------------------------------------------------------------|------------------------------------------------------------------------------------------------------------------------------------------------------------------|
| Strukturelle Komplexität | zufließen, abfließen                                                                | trennbare Verben, deren Verstehen grundlegend für die Lösung der Aufgabe ist                                                                                     |
|                          | Schwimmbecken                                                                       | Komposita sind strukturell komplex; dieses Kompositum ist aus dem Verbstamm <i>schwimm</i> von <i>schwimmen</i> und dem Substantiv <i>Becken</i> zusammengesetzt |
|                          | Ein Schwimmbecken, das $780 \text{ m}^3$ fasst, kann...                             | Satzgefüge (= komplexe Syntax); der Relativsatz ist in den Hauptsatz eingeschoben                                                                                |
|                          | Berechne, wie viel $\text{m}^3$ Wasser pro Stunde zufließen und wie viel abfließen. | komplexer Satz (= Satzgefüge), der aus dem Hauptsatz <i>Berechne</i> und zwei aneinander gereihten Nebensätzen (Fragen) besteht.                                 |

<sup>1</sup> Susanne Stein (oJ): Textaufgaben zur Bruchrechnung (letzter Zugriff 24.10.2025: [https://www.igs-sk.w.de/fileadmin/dateien/Lernmaterial\\_Corona\\_vor\\_Ostern/Stufe\\_6/6b\\_Mathematik\\_Stein\\_.pdf](https://www.igs-sk.w.de/fileadmin/dateien/Lernmaterial_Corona_vor_Ostern/Stufe_6/6b_Mathematik_Stein_.pdf))

|                |                                                         |                                                                                                                                                           |
|----------------|---------------------------------------------------------|-----------------------------------------------------------------------------------------------------------------------------------------------------------|
|                | Der Ablauf des gesamten Wassers                         | komplexe Nominalphrase mit Genitivattribut                                                                                                                |
| Mehrdeutigkeit | fassen                                                  | hat in der Alltagssprache eine andere Bedeutung: ergreifen, festhalten, greifen, anfassend berühren                                                       |
|                | Ablauf                                                  | hat mehrere Bedeutungen: Stelle, an der etwas abläuft, Verlauf, Beendigung einer Zeitspanne und hier in der Aufgabe ist das Abfließen des Wassers gemeint |
| Frequenz       | m <sup>3</sup> , 4 ⅓, 3 ⅓, fassen, zufließen, abfließen | diese Abkürzungen und Verben kommen in der Alltagssprache selten vor                                                                                      |

Für alle Prinzipien lassen sich Beispiele in den drei Sätzen finden, was wiederum auf eine sprachlich recht anspruchsvolle Textaufgabe schließen lässt. Das einzige Kompositum (*Schwimmbecken*) ist jedoch verhältnismäßig frequent und sein Verständnis nur bedingt relevant für die Lösung der mathematischen Aufgabe. Dafür sind die Verben i.d.R. strukturell komplex (keine Simplexverben wie *fließen*, sondern *ab- /zufließen*) und müssen den beiden Rechenoperationen zugeordnet werden; eine besondere Herausforderung besteht ggf. darin, dass *kann gefüllt werden* mit *zufließen* und *Ablauf* mit *abfließen* jeweils aufeinander bezogen werden müssen.

2. Lesen Sie den Schulbuchauszug unten zum Thema „Großlandschaften“ und notieren Sie stichpunktartig, welche Textmerkmale auf die Funktionen Präzision, Ökonomie und Origo-Exklusivität zurückzuführen sind

Nachfolgend finden Sie einen Lösungsvorschlag, der zur Orientierung dienen soll. Weitere Lösungsbeispiele sind möglich.

#### 1. Präzision

|                        |                                                                                                                                                                                                                                                                                                               |
|------------------------|---------------------------------------------------------------------------------------------------------------------------------------------------------------------------------------------------------------------------------------------------------------------------------------------------------------|
| Eindeutige Benennungen | <ul style="list-style-type: none"> <li>Fachwörter wie z.B. <i>Kordilleren</i>, <i>Faltengebiete</i>, <i>Schwemmlandniederung</i></li> </ul>                                                                                                                                                                   |
| Charakterisierungen    | <ul style="list-style-type: none"> <li>Komposita wie z.B. <i>Kettengebirge</i>, <i>Inselbögen</i></li> <li>Attribute wie z.B. <i>von ausgedehnten Bergländern</i> (<i>ausgedehnten</i> ist ein so genanntes Partizipialattribut, <i>ausgedehnt</i> ist das Partizip II des Verbs <i>ausdehnen</i>)</li> </ul> |

#### 2. Ökonomie

|                                             |                                                                                                                                                                                                                                                                                                                                                                                                             |
|---------------------------------------------|-------------------------------------------------------------------------------------------------------------------------------------------------------------------------------------------------------------------------------------------------------------------------------------------------------------------------------------------------------------------------------------------------------------|
| Sprachliche Mittel, die der Ökonomie dienen | <ul style="list-style-type: none"> <li>Komposita wie z.B. <i>Kettengebirge</i>, das als Fachbegriff von Bedeutung ist – eine Formulierung wie „lang gestrecktes, durch Längstäler gegliedertes Gebirge“ wäre wesentlich umfangreicher</li> <li><i>Parallel zur Westküste verlaufen Kettengebirge, die Kordilleren</i> (<i>span. cordillere = Kette</i>), <i>die nach ihrer Entstehung zu den</i></li> </ul> |
|---------------------------------------------|-------------------------------------------------------------------------------------------------------------------------------------------------------------------------------------------------------------------------------------------------------------------------------------------------------------------------------------------------------------------------------------------------------------|

|  |                                                                                                                                                                                                                                                                                                                                                                                                                                                                                                                                          |
|--|------------------------------------------------------------------------------------------------------------------------------------------------------------------------------------------------------------------------------------------------------------------------------------------------------------------------------------------------------------------------------------------------------------------------------------------------------------------------------------------------------------------------------------------|
|  | <p><i>jungen Faltengebirgen gehören. → ausformuliert könnte dieser Satz auch folgendermaßen lauten: Die Kettengebirge, die nach dem spanischen Wort für Kette (= cordillere) auch Kordilleren genannt werden, verlaufen parallel zur Westküste und gehören zu den jungen Faltengebirgen, weil sie vor 30 bis 70 Millionen Jahren entstanden sind.</i> Die Apposition <i>die Kordilleren</i> (<i>span. cordillere = Kette</i>) und die Nominalisierung <i>Entstehung</i> führen zu Verdichtung und Ökonomie im sprachlichen Ausdruck.</p> |
|--|------------------------------------------------------------------------------------------------------------------------------------------------------------------------------------------------------------------------------------------------------------------------------------------------------------------------------------------------------------------------------------------------------------------------------------------------------------------------------------------------------------------------------------------|

### 3. Origo-Exklusivität

|                                           |                                                                                                                                                                                                                                                                                                                                                                                                                      |
|-------------------------------------------|----------------------------------------------------------------------------------------------------------------------------------------------------------------------------------------------------------------------------------------------------------------------------------------------------------------------------------------------------------------------------------------------------------------------|
| Sprachliche Mittel zur Deagentivierung    | <ul style="list-style-type: none"> <li>• Verwendung von Passivformen wie z.B. <i>Mittelamerika <u>wird</u> zum größten Teil von den Kordilleren <u>eingegenommen</u>...</i></li> <li>• Nominalisierungen wie z.B. <i>Entstehungen</i></li> <li>• keine Verwendung von Personalpronomen (z.B. keine Formulierungen wie: <i><u>Wir</u> glauben, dass Mittel- und Südamerika Gemeinsamkeiten aufweisen.</i>)</li> </ul> |
| Sprachliche Mittel zur Detemporalisierung | <ul style="list-style-type: none"> <li>• Präsens Indikativ: der ganze Text ist im Präsens Indikativ verfasst und suggeriert dadurch allgemeingültige Faktizität</li> </ul>                                                                                                                                                                                                                                           |

Zusammenfassend lässt sich sagen, dass Präzision, Ökonomie und Origo-Exklusivität in diesem Schulbuchauszug zum Tragen kommen. Dafür, dass es sich um einen verhältnismäßig kurzen Text handelt, vermittelt dieser sehr verdichtet viele fachliche Informationen, ohne dass Meinungen oder Haltungen von Personen(gruppen) eine Rolle spielen würden. Gleichzeitig wird Vorwissen von Seiten der Leser\*innen vorausgesetzt (keine Erklärungen von Fachwörtern wie *Schwemmlandniederung, Tiefland, Faltengebirge, Kettengebirge* etc.). Für den Unterricht bedeutet das, dass der Text von Schüler\*innen gelesen werden sollte, wenn entsprechendes Vorwissen bereits vorhanden ist. Falls nicht, dann sollte die Textlektüre entsprechend (vor-)entlastet werden (vgl. auch das Kapitel zum Lesen).

3. Projekt: Analysieren Sie in Anlehnung an den Text einen (Schulbuch-)Text aus Ihrem Unterricht mit Hilfe der beiden Perspektiven, die im Kapitel vorgestellt worden sind. Welche Gemeinsamkeiten und Unterschiede weisen die aus der Analyse hervorgehenden Ergebnisse auf? Und welche Ableitungen lassen sich für den Umgang mit dem Text im Unterricht ziehen?

Für diese Aufgabe gibt es zahlreiche individuelle Lösungen. Idealerweise können Sie sich über diese mit Kommiliton\*innen und/oder Kolleg\*innen austauschen, ggf. auch im Rahmen von universitären Seminarsitzungen.



## 5. Mehrsprachigkeit in Schule und Unterricht

### Aufgaben vor dem Lesen

1. *Lesen Sie die nachfolgenden Fragen – sprechen Sie auch gerne mit Kommiliton\*innen oder Kolleg\*innen darüber.*
  - a. *Würden Sie sich selbst als mehrsprachig bezeichnen? Warum (nicht)?*
  - b. *Ab wann ‚kann‘ man eine Sprache?*

Bei dieser Aufgabe gibt es zahlreiche mögliche individuelle Lösungen. Da es um Ihre persönliche Haltung geht, gibt es auch kein Richtig oder Falsch. Im Laufe des Kapitels werden diese Fragen aufgegriffen und aus Perspektive der Sprachwissenschaft sowie der Autorinnen beantwortet. Idealerweise gleichen Sie Ihre Notizen nach der Lektüre des Kapitels noch einmal ab und überlegen, ob Sie Ihre anfänglichen Antworten durch das Gelesene ändern.

2. *Wo auch immer Sie gerade sitzen oder stehen, um diesen Text zu lesen. Sehen Sie sich um – gibt es in Ihrer Nähe irgendwo ‚Mehrsprachigkeit‘? Z.B. auf einem Schild oder einer Webseite, die Sie geöffnet haben – an wen wendet sich diese Mehrsprachigkeit und was ist ihre Funktion? Falls Sie keine Mehrsprachigkeit entdecken können, warum ist das der Fall?*

Für diese Aufgabe gibt es selbstverständlich zahlreiche individuelle Lösungen und kein Richtig oder Falsch. Nachfolgend finden Sie dennoch ein Beispiel.

Ich befinde mich in meinem Wohnzimmer und arbeite an einem Laptop. Ich habe Websites geöffnet, die englischsprachig sind. Dies liegt vermutlich daran, dass diese Websites Dienste anbieten, die global zugänglich sind und sich an unterschiedliche Zielgruppen wenden. Die Sprache Englisch kommt zum Einsatz, da es die/einer der meistgesprochenen Sprachen ist.

Funktion Mehrsprachigkeit: Die Funktion von Mehrsprachigkeit auf z.B. Plakaten oder Websites ist die Verbesserung der Kommunikation und Zugänglichkeit für Menschen mit unterschiedlichen sprachlichen Hintergründen. Wenn es sich um Werbung handelt, dann geht es sicher auch um eine möglichst große Reichweite und Englisch sprechen auch viele Personen als Fremd- bzw. Zweitsprache.

Keine Mehrsprachigkeit: Falls keine Mehrsprachigkeit in der unmittelbaren Umgebung zu finden ist, dann kann das darauf hindeuten, dass an diesem Standort entweder kaum/keine verbale Sprache zugänglich ist oder eine sprachliche homogene Gemeinschaft zusammenkommt, deren Interaktion untereinander auf einer bestimmten Sprache erfolgt. Spätestens aber, wenn Sie zu Hause in Ihr Badezimmer gehen und eine Shampooflasche oder Ähnliches zur Hand nehmen, werden Sie auf Mehrsprachigkeit treffen.

3. *Bitte überlegen Sie, inwieweit Sie den nachfolgenden Äußerungen zustimmen und kreuzen Sie dementsprechend an.*

Da es zunächst um Ihre persönliche Haltung geht, gibt es für diese Aufgabe kein Richtig oder Falsch. Allerdings problematisieren wir im Laufe des Kapitels einige gängige Vorurteile bzgl.

Maak, Diana/ Petersen, Inger (2025): Sprachbildung in allen Schulfächern der Sekundarstufe. Grundlagen, Konzepte und Methoden der germanistischen Linguistik und Sprachdidaktik. De Gruyter.

Mehrsprachigkeit; so kann die Sprachwissenschaft die Äußerung *Wenn Jugendliche ihre Sprachen mischen, dann ist das meist ein Zeichen von hoher Sprachkompetenz* gut belegen.

4. Wie nennen Sie das Abgebildete<sup>2</sup>? Bitte recherchieren Sie weitere Bezeichnungen.

|                                                                                                                                                                             |                                                                                                                                                                                                                    |
|-----------------------------------------------------------------------------------------------------------------------------------------------------------------------------|--------------------------------------------------------------------------------------------------------------------------------------------------------------------------------------------------------------------|
|                                                                                            |                                                                                                                                  |
| <ul style="list-style-type: none"> <li>• Rundstück</li> <li>• Brötchen</li> <li>• Schrippe</li> <li>• Weck</li> <li>• Kipfel</li> <li>• Semmel</li> <li>• Laabla</li> </ul> | <ul style="list-style-type: none"> <li>• Hackfleischbällchen</li> <li>• Bulli</li> <li>• Eternitplätzchen</li> <li>• Hundepuffer</li> <li>• Buletten</li> <li>• Fleischpflanzerl</li> <li>• Frikadellen</li> </ul> |

Die Bezeichnungen werden in der Regel regionalspezifisch verwendet. Vielleicht kennen Sie sogar noch weitere Bezeichnungen. Für ein Brötchen und für Frikadellen gibt es im deutschsprachigen Raum also sehr viele verschiedene Bezeichnungen. Welche und wie viele Sie davon kennen, hängt von unterschiedlichen Faktoren ab, z.B. wo Sie aufgewachsen sind, ob Sie im deutschsprachigen Raum viel gereist oder umgezogen sind etc.

## Aufgaben nach dem Lesen

1. Lesen Sie die Aussagen in Aufgabe 3. (Aufgaben vor dem Lesen) noch einmal. Würden Sie nach der Lektüre hier etwas ändern an Ihrer Einschätzung? Warum (nicht)?

Möglichweise hat sich die Einschätzung in Bezug auf die Aussagen in Aufgabe 3.) verändert. Dies könnte beispielsweise daran liegen, dass Sie durch das Lesen des Textes (mehr) Wissen im Bereich der Mehrsprachigkeit (der Schüler\*innen) erlangt haben. Selbstverständlich ist es auch möglich, dass sich Ihre Einschätzungen nicht verändert haben.

2. Januschek (2016: 213) hält Mehrsprachigkeitskompetenz für die „einzig sinnvolle Alternative zu einer universalen Sprache“. Welche Haltung haben Sie dazu? Was kann

<sup>2</sup> <https://commons.wikimedia.org/wiki/File:Kaisersemmel-.jpg> Wikimedia Commons (letzter Zugriff 18.07.2023); [https://commons.wikimedia.org/wiki/File:2023\\_Kotlety\\_mielone.jpg](https://commons.wikimedia.org/wiki/File:2023_Kotlety_mielone.jpg) Wikimedia Commons (letzter Zugriff 18.07.2023). <https://www.falstaff.com/de/news/typisch-deutsch-frikadelle-bulette-fleisch>

Maak, Diana/ Petersen, Inger (2025): Sprachbildung in allen Schulfächern der Sekundarstufe. Grundlagen, Konzepte und Methoden der germanistischen Linguistik und Sprachdidaktik. De Gruyter.

*Mehrsprachigkeitskompetenz leisten und was nicht? Welche Vor- und Nachteile hätte es, wenn alle Menschen dieser Welt eine einzige, universale Sprache sprechen würden?*

Die Idee der universalen Sprache meint, dass alle Menschen – neben z.B. einer Erstsprache – eine weitere universale Sprache lernen. Diese ermöglicht es, dass alle Menschen gleichberechtigt miteinander kommunizieren können. Daher sollte eine solche Sprache möglichst einfach zu erlernen und ‚neutral‘ sein. Das sicher bekannteste Beispiel für den Versuch, eine universale Sprache zu erschaffen, ist Esperanto. Mehrsprachigkeitskompetenz kann als Bereicherung angesehen werden. Durch diese Kompetenz wird es Individuen ermöglicht, sich effektiv in verschiedenen Kommunikationssituationen auszudrücken.

#### Leistungen Mehrsprachigkeitskompetenz:

- Flexibilität in der Kommunikation: Durch Mehrsprachigkeitskompetenz wird es Individuen ermöglicht, je nach Kontext flexibel zwischen unterschiedlichen Sprachen zu wechseln.
- Offenheit für unterschiedliche Kulturen/sprachliche Identitäten
- Verknüpfung Denken und kommunikatives Handeln
- ...

#### Vor- und Nachteile universale Sprache:

| Vorteile                                                                                                                                                                                                                                                                                                                                            | Nachteile                                                                                                                                                                                                                                                                                                                                                                 |
|-----------------------------------------------------------------------------------------------------------------------------------------------------------------------------------------------------------------------------------------------------------------------------------------------------------------------------------------------------|---------------------------------------------------------------------------------------------------------------------------------------------------------------------------------------------------------------------------------------------------------------------------------------------------------------------------------------------------------------------------|
| <ul style="list-style-type: none"><li>• Globale Kommunikation (Abbau sprachlicher Kommunikationsbarrieren)</li><li>• Potentielle Reduzierung sprachlicher Missverständnisse</li><li>• Beseitigung sprachlicher Diskriminierung</li><li>• Abbau der Bedeutung des Prestiges von Sprachen</li><li>• Wirtschaftliche Effizienz</li><li>• ...</li></ul> | <ul style="list-style-type: none"><li>• Diskriminierung (Wie soll es umgesetzt werden, dass jeder sich anpasst und die universelle Sprache lernt?) aufgrund unterschiedlicher Voraussetzungen ggf. aber auch unbewusste Reproduktion von Diskriminierung</li><li>• Aussterben von Sprachen, wenn die universale Sprache andere Sprachen verdrängt</li><li>• ...</li></ul> |

3. Wählen Sie ein Schulbuchkapitel aus einem Ihrer Fächer aus und überlegen Sie, wie Sie das Thema im Unterricht bearbeiten würden. An welchen Stellen wäre es möglich, im Unterrichtsverlauf Mehrsprachigkeit zu berücksichtigen? Beantworten Sie dazu die vier Fragen zur Kultur der Mehrsprachigkeit. Und überprüfen Sie, ob sich auch Beispiele für ‚verdeckte Mehrsprachigkeit‘ in den Unterrichtsmaterialien finden.

Für diese Aufgabe gibt es zahlreiche individuelle Lösungen. Idealerweise können Sie sich über diese mit Kommiliton\*innen und/oder Kolleg\*innen austauschen, ggf. auch im Rahmen von universitären Seminarsitzungen. Erste Hinweise finden sich auch im Kapitel.

## 6. Sprachen und Macht im schulischen Kontext

### Aufgaben vor dem Lesen

1. *Was ist für Sie die schönste Sprache der Welt? Und aus welchen Gründen ist dies für Sie die schönste Sprache der Welt?*

Es gibt zahlreiche individuelle Lösungen und kein Richtig und kein Falsch. Auf das Thema wird im Studienbuchkapitel eingegangen.

2. *Lesen Sie die Fragen (Krumm 2021: 13, 16, 33; gekürzt, teilweise angepasst und ergänzt). Wählen Sie spontan eine Frage aus, die Sie interessiert, und schreiben Sie auf, was Ihnen dazu einfällt.*

Es gibt zahlreiche individuelle Lösungen und kein Richtig und kein Falsch. Idealerweise können Sie sich über diese mit Kommiliton\*innen und/oder Kolleg\*innen austauschen, ggf. auch im Rahmen von universitären Seminarsitzungen. Die Ausführungen im Studienbuchkapitel tragen direkt und indirekt zur Beantwortung der Fragen bei.

### Aufgaben nach dem Lesen

1. *Zentrale Termini des Kapitels sind: Sprachideologie, Sprachenpolitik, Praxen der Sprachrepräsentation, Sprachhierarchien, Sprachmarkt – versuchen Sie, diese mit eigenen Worten zu definieren.*

Es gibt zahlreiche individuelle Lösungen. Idealerweise können Sie sich über diese mit Kommiliton\*innen und/oder Kolleg\*innen austauschen, ggf. auch im Rahmen von universitären Seminarsitzungen. Nachfolgend finden Sie ein Beispiel.

Sprachideologie: Unter Sprachideologien lassen sich Überzeugungen, Annahmen oder Einstellungen über Sprachen und Sprachverwendungen verstehen, diese Ideologien führen dazu, dass verschiedene Sprachen als beispielsweise wertvoll oder minderwertig angesehen werden.

Sprachenpolitik: Im Rahmen von Sprachenpolitik werden offizielle und informelle Entscheidungen über die Nutzung oder auch Förderung von Sprachen getroffen. Akteur\*innen sind z.B. Politiker\*innen, die über Gesetze abstimmen, aber auch Schulleitungen, die Vorgaben zur Sprachverwendung auf dem Pausenhof machen. Sprachenpolitik greift regulierend z.B. in die Verwendung, Vermittlung und Verbreitung von Sprachen ein.

Praxen der Sprachrepräsentation: Die Praxen der Sprachrepräsentationen beziehen sich darauf, auf welche Art und Weise Sprachen in z.B. den Medien oder unterschiedlichen Diskursen dargestellt werden, um bestimmte Identitäten oder Bedeutung zu schaffen. Daher ist die Repräsentation von Sprachen eng mit Sprachenpolitik verknüpft.

Sprachhierarchien: Sprachhierarchien sind (soziale) Ordnungen, die zwischen verschiedenen Sprachen oder auch Dialekten bestehen. Dabei werden sie nach ihrem Prestige oder ihrer gesellschaftlichen Wertschätzung eingeordnet.

Maak, Diana/ Petersen, Inger (2025): Sprachbildung in allen Schulfächern der Sekundarstufe. Grundlagen, Konzepte und Methoden der germanistischen Linguistik und Sprachdidaktik. De Gruyter.

Sprachmarkt: Der Sprachmarkt ist das System, in dem Sprachen und sprachliche Fähigkeiten ökonomisch, kulturell und sozial bewertet werden. Dies kann den Wert einer Sprache für Bildung und Beruf steigern, so dass das Beherrschen einer bestimmten Sprache (wirtschaftliche) Vorteile bringen kann.

2. *Notieren Sie Ihre ganz persönliche Sprachenhierarchie und überlegen Sie, durch welche persönlichen Erfahrungen und welche sprachenpolitischen Maßnahmen und Sprachideologien diese beeinflusst sind.*

Es gibt zahlreiche individuelle Lösungen. Idealerweise können Sie sich über diese mit Kommiliton\*innen und/oder Kolleg\*innen austauschen, ggf. auch im Rahmen von universitären Seminarsitzungen. Nachfolgend finden Sie ein Beispiel.

1. Deutsch
2. Englisch
3. Französisch und Spanisch
4. Arabisch, Türkisch...

Die deutsche Sprache hat für mich eine zentrale Bedeutung, da ich sie eng mit meiner eigenen Herkunft und Identität verbinde. Meine persönliche Sprachenhierarchie wird maßgeblich durch meine Erfahrungen bei verschiedenen Reisen und das Kennenlernen unterschiedlicher Kulturen geprägt. Diese Erlebnisse haben dazu geführt, dass ich die englische Sprache als besonders wichtig für internationale Kommunikation, Medien und berufliche Belange betrachte. Außerdem habe ich Englisch als erste Fremdsprache lange in der Schule gelernt. Darüber hinaus begegnete ich in den von mir besuchten Ländern häufig dem Französischen und Spanischen, was dazu führt, dass ich diesen Sprachen ebenfalls eine hohe Bedeutung zuschreibe. Schließlich nehme ich Sprachen wie Arabisch oder Türkisch als weniger vertraut wahr, da mein sprachlicher Kontakt zu diesen bisher begrenzt war. Trotz dieser geringeren Vertrautheit halte ich diese Sprachen für bedeutend, da sie von einem erheblichen Teil der Weltbevölkerung gesprochen werden. Außerdem sind sie für mich von beruflicher Relevanz, da viele Schüler\*innen diese Sprachen beherrschen.

3. *Recherchieren Sie zu Sprachverboten bzw. verbotenen Sprachen und informieren Sie sich zu einem konkreten Beispiel näher.*

Es gibt zahlreiche individuelle Lösungen. Idealerweise können Sie sich über diese mit Kommiliton\*innen und/oder Kolleg\*innen austauschen, ggf. auch im Rahmen von universitären Seminarsitzungen. Nachfolgend finden Sie ein Beispiel.

#### Unterdrückung der walisischen Sprache

Die walisische Sprache (auch bekannt als Welsh) ist eine keltische Sprache, die in Wales gesprochen wird. Im 19. und frühen 20. Jahrhundert wurden verschiedene Maßnahmen ergriffen, um die walisische Sprache in Konkurrenz zur englischen Sprache zu unterdrücken, was zu einem drastischen Rückgang der Sprachverwendung führte (z.B. Schulpolitik, Gesetz-

Maak, Diana/ Petersen, Inger (2025): Sprachbildung in allen Schulfächern der Sekundarstufe. Grundlagen, Konzepte und Methoden der germanistischen Linguistik und Sprachdidaktik. De Gruyter.

gebung, gesellschaftliche Diskriminierung). Dennoch gab es politische und gesellschaftliche Gegenmaßnahmen, die eine ‚Wiederbelebung‘ der walisischen Sprache initiierten.

4. *Sehen Sie sich die Plakate an zur Kampagne ich-spreche-deutsch. Welche Sprachideologie(n) werden hier erkennbar?*

Ziel der Kampagne ist es, junge Migrant\*innen für das Deutsch lernen zu begeistern. Testimonials (hier bekannte Moderatorin/Schauspieler\*in und bekannter Schauspieler, die und der selbst einen Migrationshintergrund hat; Elias M'Bareks Vater z.B. stammt aus Tunesien) zeigen ihre Zunge, die in den Farben der deutschen Nationalflagge gestaltet ist. In Kombination mit dem Slogan *Raus mit der Sprache. Rein ins Leben.* wird suggeriert, dass lediglich mit Deutschkompetenzen Integration in Deutschland möglich ist. Sprache und Sprachkompetenz wird also gleichgesetzt damit, ‚im Leben zu stehen‘. Mehrsprachigkeit spielt keine Rolle – so wird z.B. nicht klar, inwiefern die Testimonials noch andere Sprachen auf der Zunge haben. Dies lässt sich als Einsprachigkeitsideologie bzw. Ideologie vom einsprachigen Deutschland (Deutschland = deutsch sprechen) als Normal- und Regelfall interpretieren. Damit werden aber ggf. auch wichtige Facetten der Identität der Testimonials nicht abgebildet.

5. *Lesen Sie den Zeitungsbericht „Türkisch studieren an der FU Berlin“ (S. 104). Woran zeigt sich in diesem Fall, wie Sprachenpolitik auch mit der Durchsetzung politischer Interessen zusammenhängt? Recherchieren Sie, ob der Studiengang mittlerweile an der FU Berlin eingeführt worden ist.*

Voraussetzung dafür, dass ein Studiengang wie Türkisch für Lehramt eingerichtet werden kann, ist, dass der politische Senat in Berlin dem Vorhaben zustimmt. Neben einer allgemeinen Argumentation für die Sinnhaftigkeit (zahlreiche Schüler\*innen, die von diesem Angebot profitieren könnten), wird auch das Argument eingebracht, dass so eine bessere Kontrolle über Inhalte der Lehrer\*innenbildung und damit auch des Türkischunterrichts gewährleistet ist. Damit handelt es sich um die Durchsetzung politischer Interessen.

Recherche Stand 07/2024: Das neue Studienangebot soll laut Homepage der Freien Universität Berlin zum Wintersemester 2024/25 studierbar sein; das bedeutet, dass sich der Start, der im Artikel für Wintersemester 2020/21 angekündigt war, um mehr als vier Jahre verschoben hat, da es zum aktuellen Zeitpunkt (10/2025) noch nicht möglich ist, Türkisch auf Lehramt zu studieren.

## 7. Neu zugewanderte Schüler\*innen im Regelunterricht

### Aufgaben vor dem Lesen

1. *Lesen Sie sich die nachfolgenden Zitate aus Interviews mit vier unterschiedlichen neu zugewanderten Schüler\*innen durch, die über ihre Erfahrungen im deutschen Schulunterricht berichten, und beschreiben Sie die besondere Lernsituation, in der sich diese Schüler\*innen befinden.*

Für diese Aufgabe gibt es individuelle Lösungen. Idealerweise können Sie sich über diese mit Kommiliton\*innen und/oder Kolleg\*innen austauschen, ggf. auch im Rahmen von universitären Seminarsitzungen. Nachfolgend finden Sie das Beispiel einer Studentin. Weitere Hinweise zur besonderen Lernsituation von neu zugewanderten Schüler\*innen finden Sie im Studienbuchkapitel.

Die Äußerungen der Schüler\*innen zeigen, dass Besonderheiten der Lernsituationen für neu zugewanderte Schüler\*innen u.a. die folgenden sind

- Neu- und Fremdheit der schulischen Anforderungen (z.B. Erörterung schreiben) und Erwartungen von Lehrer\*innen, aber ggf. auch Mitschüler\*innen
- Neu- und Fremdheit der schul- ggf. auch fachspezifischen Verhaltensweisen (z.B. abweichende Sitzordnung)
- Unterschiede im Vorwissen aufgrund unterschiedlicher Lehrpläne und curricularer Vorgaben während des bisherigen Schulbesuchs – sowohl größeres als auch geringeres Vorwissen mit Blick auf bestimmte Fächer ist möglich (z.B. Vorsprung im Bereich Mathematik)
- Migration ist ein Prozess, der sich über viele Jahre erstreckt und nicht nach ein bis zwei Jahren abgeschlossen ist; dies gilt auch für die Entwicklung der Sprachkompetenzen im Deutschen – selbst mit guten Sprachkompetenzen können bestimmte Anforderungen des Unterrichts herausfordernd sein

2. *Lesen Sie die nachfolgenden Schlagzeilen unterschiedlicher Nachrichtenportale durch. Analysieren Sie, wie die neuzugewanderte Schüler\*innen im Bildungskontext medial dargestellt werden.*

Für diese Aufgabe gibt es individuelle Lösungen. Idealerweise können Sie sich über diese mit Kommiliton\*innen und/oder Kolleg\*innen austauschen, ggf. auch im Rahmen von universitären Seminarsitzungen. Nachfolgend finden Sie ein Beispiel.

#### Die Migrations-Krise an unseren Schulen

(<https://www.bild.de/politik/kolumnen/kolumne/kommentar-die-migrations-krise-an-unsere-schulen-86336436.bild.html>, vom 05.12.2023)

Maak, Diana/ Petersen, Inger (2025): Sprachbildung in allen Schulfächern der Sekundarstufe. Grundlagen, Konzepte und Methoden der germanistischen Linguistik und Sprachdidaktik. De Gruyter.

Die Schlagzeile "Die Migrations-Krise an unseren Schulen" impliziert eine negative Perspektive auf neu zugewanderte Schüler\*innen. Die Bild-Zeitung stellt die zugewanderten Schüler\*innen indirekt als Belastung für das Bildungssystem dar, die zu einem Bildungs-Debakel führe. Die Schlagzeile stellt die steigende Anzahl von Kindern aus Migrant\*innen-Familien mit dem Nachbleiben einer guten Bildung gleich.

#### Ukrainische Flüchtlingskinder: Schulen fühlen sich allein gelassen

(<https://www.swr.de/swraktuell/rheinland-pfalz/trier/grundschulen-an-mosel-fordern-mehr-hilfe-im-umgang-mit-gefluechteten-kindern-100.html>, vom 15.02.2023)

Die Schlagzeile aus der SWR stellt die Situation der neu zugewanderten Schüler\*innen aus einer mitfühlenden Perspektive dar, indem hervorgehoben wird, dass die Schulen sich mit der Situation der ukrainischen zugewanderten Schüler\*innen allein gelassen fühlen. Es wird darauf hingewiesen, dass diese Kinder noch wenig Deutschkenntnisse besitzen und einige von ihnen traumatisiert sind. Die Notwendigkeit einer besseren Förderung für diese Schüler\*innen wird gefordert. Gleichzeitig erscheinen die Schüler\*innen als Herausforderungen, denen Schulen (und Lehrer\*innen?) nicht gewachsen sind.

#### So klappt die Integration in den Schulen

(<https://www.tagesschau.de/inland/gesellschaft/ukraine-gefluechtete-kinder-schulen-101.html>, vom 25.02.2023)

Die neuzugewanderten Schüler\*innen werden in der Schlagzeile der Tagesschau als Teil einer großen Herausforderung für die Schulen betrachtet. Viele Schulen stoßen aufgrund der hohen Anzahl von neuzugewanderten Schüler\*innen an ihre Grenzen, da u.a. Kapazitäten für die Sprachförderung unzureichend erscheinen. Die stetig zunehmende Zahl an neuzugewanderten Schüler\*innen erfordert sowohl mehr Ressourcen als auch strukturelle Anpassungen. Auch erscheinen die Schüler\*innen als Belastung des Systems.

In allen drei Auszügen erscheinen neu zugewanderte Schüler\*innen als Herausforderung für die Institution Schule – finanziell, organisatorisch, fachlich/pädagogisch. Dies scheint zunächst nachvollziehbar. Bedenkt man aber, dass seit den 70/80er Jahren immer wieder auch in größerer Zahl Schüler\*innen neu nach Deutschland zuwandern (z.B. Migrationsbewegungen im Zuge des Kosovokriegs 1998-1999), dann könnte man auch kritisch fragen, ob es nicht längst hätte gelingen können, Schulstrukturen und -ressourcen so zu gestalten, dass der Umgang neu zugewanderter Schüler\*innen als alltägliches Phänomen in Schulen wahrgenommen wird und konstruktiv gestaltet werden kann. Gleichzeitig stellt sich die Frage, warum nach mehr als fünfzig Jahren die meisten Lehrer\*innen nicht über ausreichende Kompetenzen verfügen, um mit diesen Schüler\*innen zu arbeiten. So wird das Thema Traumatisierungen angesprochen – dieses Thema ist nicht nur relevant für den Umgang mit neu zugewanderten Schüler\*innen, sondern für den Umgang mit allen Schüler\*innen.



## Aufgaben nach dem Lesen

1. *Stellen Sie sich folgende Situation vor: Ihre Schulleiterin teilt Ihnen zwei Wochen vor den Sommerferien mit, dass nach den Sommerferien zwei neue Schüler\*innen (beide mit L1 Ukrainisch) in die Klasse kommen werden, in der Sie Klassenlehrer\*in sind (7. Jahrgang). Die Schüler\*innen haben vorher DaZ-Unterricht in einer Vorbereitungs-klasse besucht. Bitte überlegen Sie:*

a) *Welche Informationen benötigen Sie über die Schüler\*innen? Bereiten Sie Gespräche mit der zuständigen DaZ-Lehrkraft sowie den Schüler\*innen und ihren Eltern vor. Formulieren Sie jeweils mind. drei konkrete Fragen!*

Für diese Aufgabe gibt es individuelle Lösungen. Zentral ist, dass Sie möglichst detaillierte Informationen zu fachlichen und sprachlichen Kompetenzen (Deutsch sowie Erstsprache(n) und ggf. Fremdsprachen) der Schüler\*innen erhalten und im Idealfall Hinweise darauf, was die beiden benötigen, um am Unterricht teilhaben zu können.

- Fragen nach bisher verwendeten Materialien und Lehrwerken
- Fragen nach Methoden der Zusammenarbeit und Kommunikation mit Eltern und anderen Lehrkräften (z.B. Ist Unterstützung zu erwarten? Wie ist das Schulsystem im Heimatland aufgebaut? Inwiefern sind Eltern und DaZ-Lehrkräfte erreichbar und involviert?)
- Fragen nach individuellen Bedürfnissen der Schüler\*innen (z.B. Welche Hobbys hat der\*die Schüler\*in? Funktionieren bestimmte Lehr-/Lernmethoden besonders gut/überhaupt nicht? Wie steht es um die soziale Anbindung des\*der Schüler\*in? Wie ist die Anknüpfung an die Heimat der SuS? Hat der/die Schüler\*in soziale Auffälligkeiten?)
- Fragen nach Leistungsstand (Auf welchem Sprachniveau befindet sich der/die Schüler\*in in den verschiedenen Fertigkeiten Hören, Sprechen, Lesen und Schreiben? Wie verlief der Unterricht in der Heimat? Welcher Inhalt wurde im bisherigen Unterricht behandelt bzw. nicht behandelt?)
- Fragen nach sozialen, kulturellen und gesundheitlichen Hintergründen (Hat der\*die Schüler\*in Flucht- und Kriegssituation durchlebt? Gibt es religiöse Aspekte, die zu berücksichtigen sind? Wie ist die momentane Situation zuhause? Hat der\*die Schüler\*in spezifische Angstfaktoren oder Triggerpunkte? Was hilft Schüler\*innen in stressigen Situationen? In welchem mentalen Zustand befindet sich der\*die Schüler\*in?) --> Bitte beachten Sie, dass es i.d.R. nicht notwendig ist, detaillierte Informationen z.B. zu erlebten traumatischen Ereignissen zu haben.

b) *Nennen Sie vier Maßnahmen, die Sie treffen möchten, um den beiden Schüler\*innen den Übergang in ihre Klasse zu erleichtern.*

- Zusammenarbeit mit Eltern (Information der Eltern zu wichtigen Aspekten, Gespräche und gemeinsame Planung der Vorgehensweise; Einladung zu einem Elternabend, ggf. auch Elternabend zum Thema Flucht und Migration, um andere Eltern für die Situation der

Schüler\*innen zu sensibilisieren) → konkrete Maßnahme z.B.: Eltern könnten jeweils Zusammenfassung des Elternabends in ihrer Erstsprache erhalten

- Zusammenarbeit mit anderen Lehrkräften (anderer Fächer und vorige Förder- bzw. DaZ-Lehrkräfte um Leistungsstand zu erfragen und Integration in den Unterricht zu erleichtern) → konkrete Maßnahme z.B.: 10-minütiges Gespräch mit DaZ-Lehrkraft alle zwei Wochen zu anstehenden Inhalten im Fachunterricht und relevanten Kompetenzen, sodass die DaZ-Lehrkraft ggf. unterstützend arbeiten kann (z.B. Fokus auf Konjunktionen, die für das Argumentieren wichtig sind im DaZ-Unterricht, wenn Erörterung geschrieben werden soll)
- Sprachdiagnose und Leistungsstand ermitteln (durch Berichte/Noten der vorigen Lehrkräfte; spezifische Bedürfnisse der Schüler\*innen ermitteln → Lernverhalten und ideale Lernbedingungen etc.)
- Vertrauensverhältnis zu Lehrkräften und Mitschüler\*innen fördern (bspw. Zusammenführen mit Mitschüler\*innen, die die gleiche Sprache sprechen; außerschulische Aktivitäten/Ausflüge; Pat\*innen an der Schule zuweisen; Teambuilding-Aktivitäten; Sich als Ansprechpartner\*in etablieren; die neue Klasse zu einem sicheren Ort für die Schüler\*innen machen; Die Klasse im gemeinsamen Gespräch auf die Integration der neuen Schüler\*innen vorbereiten)
- Lehrinhalt ggf. anpassen und für Barrierefreiheit sorgen (reibungslose Integration in das Unterrichtsgeschehen; Angst vor Fehlern nehmen; differenzierte Aufgaben vergeben; die SuS bei schwierigen Inhalten nicht ausschließen; Fokus nicht auf sprachlicher sondern auf fachinhaltlicher Leistung).

2. Lesen Sie die Kurzbeschreibung zu einer Unterrichtsstunde zum Thema Versailler Vertrag. Im Anschluss finden Sie Hinweise dazu, was Schüler\*innen (noch nicht) können und wie sie unterstützt werden könnten. Ordnen Sie diese in der nachfolgenden Tabelle den Fertigkeiten und der passenden Niveaustufe zu. Eine Mehrfachzuordnung ist möglich.

| Teilkompetenz                                      | Niveau | Zuordnung |
|----------------------------------------------------|--------|-----------|
| Schriftliche Produktion allgemein                  | B2     |           |
|                                                    | B1     | f         |
| Leseverstehen allgemein                            | B2     | g         |
|                                                    | B1     | d, e      |
| Muttersprachliche Gesprächspartner*innen verstehen | B2     |           |
|                                                    | B1     | a, b, c   |

Liegt Wissen zur Sprachkompetenz von Schüler\*innen vor, dann können auf Basis der Kann-Beschreibungen Hinweise darauf abgeleitet werden, welche Unterstützung für die Schüler\*innen möglich bzw. notwendig ist. So würden wir auf B2-Niveau z.B. keine vereinfachte Zusammenfassung des Redentextes zur Unterstützung mehr empfehlen. Wenn aber ein Schüler erst das A2-Niveau im Lesen erreicht hat, könnte dies eine sinnvolle Maßnahme sein, um die Auseinandersetzung mit dem Thema zu ermöglichen.

## 8. Bedarfsanalyse: Sprachliche Anforderungen des Unterrichts

### Aufgaben vor dem Lesen

1. *Die folgende Tabelle zeigt einige Aussagen zum Thema sprachbildender Fachunterricht (vgl. Reble & Petersen 2021). Bitte geben Sie bei jeder Aussage an, inwieweit diese auf Sie persönlich zutrifft. Falls die Aussagen (eher) nicht auf Sie zutreffen: Welche Kompetenzen würden Sie noch benötigen, um den Aussagen zustimmen zu können?*

Für diese Aufgabe gibt es zahlreiche individuelle Lösungen. Idealerweise können Sie sich über diese mit Kommiliton\*innen und/oder Kolleg\*innen austauschen, ggf. auch im Rahmen von universitären Seminarsitzungen. Interessant ist vor allem, wie ausgeprägt Ihre Selbstwirksamkeit im Hinblick auf die Unterrichtsplanung und -durchführung ist. Idealerweise erhalten Sie durch die Lektüre dieses Kapitels sowie der weiteren Kapitel im Studienbuch Unterstützung dafür, diese Aufgaben im Unterrichtsalltag (besser) meistern zu können, da sie sowohl Aufgaben als auch Ziele von sprachbildendem Unterricht darstellen.

2. *Scaffolding ist im pädagogisch-psychologischen Kontext ein wichtiges Konzept für die konstruktive Unterstützung von Schüler\*innen in einem adaptiven Unterricht. Bitte notieren Sie sich alles, was Ihnen zum Thema Scaffolding einfällt.*

Für diese Aufgabe gibt es zahlreiche individuelle Lösungen. Nachfolgend finden Sie einen Lösungsvorschlag, der zur Orientierung dienen kann.

- Hilfe zur Selbsthilfe: Unterstützung für die Bewältigung von Aufgaben, die Schüler\*innen noch nicht eigenständig lösen können
- adaptiv Hilfestellungen anbieten (angepasst an individuellen Lernvoraussetzungen und Lernprozesse der Schüler\*innen)

3. *Bitte nehmen Sie Stellung zu der folgenden Aussage einer Lehrkraft. Gerne können Sie sich auch mit Kommiliton\*innen und/oder Kolleg\*innen dazu austauschen.*

Es handelt sich hier um einen eher defensiven Umgang mit Texten (Entlastung und Unterstützungsangebote für Schüler\*innen; vgl. auch Kapitel zu Lesen im Studienbuch). Einerseits ist dies sinnvoll und sehr positiv ist, dass die Lehrerin bei der Bewertung versucht, sicherzugehen, dass sie nicht Sprachkompetenz, sondern Fachkompetenz bewertet. Andererseits sollten Schüler\*innen perspektivisch in der Lage sein, sich Inhalte von Schulbuchtexten eigenständig zu erarbeiten sowie zusammenhängende Texte zu schreiben. Daher sollten sie auch darin unterstützt werden. Sprachbildender Unterricht bedeutet nicht Vereinfachung; dennoch sollte insbesondere im Rahmen der Unterrichtsvorbereitung auch antizipiert werden, welche sprachlichen Anforderungen des Unterrichts ggf. eine Herausforderung darstellen könnten (vgl. auch Ausführungen im Studienbuchkapitel sowie im Kapitel zu Herausforderungen von Sprache).

## Aufgaben nach dem Lesen

1. Sehen Sie sich das Bild von Napoleon Bonaparte an. Lesen Sie dann zunächst die Schreibaufgabe (Beobachtung) zum Bild und im Anschluss die beiden Erwartungshorizonte.

a) Vergleichen Sie die beiden Erwartungshorizonte in Hinblick auf Wort-, Satz- und Textebene.

Bitte beachten Sie, dass für diese Aufgabe selbstverständlich verschiedene Lösungen möglich sind. Nachfolgend finden Sie einen Lösungsvorschlag, der zur Orientierung dienen kann und zu dem Ihre Notizen zumindest gewissen Übereinstimmungen aufweisen sollten.

|           | Gemeinsamkeiten                                                                                                                                                                                                                                                                                                                           | Unterschiede                                                                                                                                                                                                                                                                                                                                                                                                                                                               |
|-----------|-------------------------------------------------------------------------------------------------------------------------------------------------------------------------------------------------------------------------------------------------------------------------------------------------------------------------------------------|----------------------------------------------------------------------------------------------------------------------------------------------------------------------------------------------------------------------------------------------------------------------------------------------------------------------------------------------------------------------------------------------------------------------------------------------------------------------------|
| Wortebene | <ul style="list-style-type: none"> <li>Trennbare Verben (z.B. <i>schaut...an</i> (E2); <i>streckt...aus</i> (E1).</li> <li>Komposita (z.B. <i>Soldatenkleidung</i> (E2); <i>Berglandschaft</i> (E1))</li> <li>Ähnliche Verben (<i>sehen, wirken, tragen</i>) sowie Nomen zur Beschreibung (<i>Pferd, Mähne</i>)</li> </ul>                | <ul style="list-style-type: none"> <li>Komplexe Adjektive (z.B. <i>prunkvoll</i> (E1))</li> <li>Präfixverben (z.B. <i>erzeugen</i> (E1))</li> <li>Einsatz von eher bildungssprachlichen, weniger frequent genutzten und inhaltlich differenzierter beschreibenden Wörtern (z.B. <i>Berglandschaft</i> vs. <i>Berge</i>, <i>Schweif</i> vs. <i>Schwanz</i>) in E1</li> </ul>                                                                                                |
| Satzebene | <ul style="list-style-type: none"> <li>Formelhafte Wendungen, die passend sind für Bildbeschreibungen (<i>Auf dem Gemälde ist ... zu sehen</i> (E2)/ <i>sieht man</i> (E1))</li> <li>Unpersönliche <i>man</i>-Konstruktion als Passiversatzform</li> <li>Passiv (Zustandspassiv) (<i>Der Himmel ist bewölkt</i> (E2 &amp; E1))</li> </ul> | <ul style="list-style-type: none"> <li>Varianz in der Satzstruktur (z. B. einfache und komplexe Sätze) in E1; in E2 finden sich bis auf eine Ausnahme keine Satzgefüge</li> <li>Längere Sätze durch komplexe Nominalphrasen (<i>weißes, sich aufbäumendes Pferd, die nach oben gestreckte Hand, das dem Betrachter zugewandte entschlossene Gesicht</i>) in E1</li> <li>Weitere Passiversatzform: <i>sich lassen</i> + Infinitiv (<i>sich...ausmachen</i> (E1))</li> </ul> |
| Textebene | <ul style="list-style-type: none"> <li>Kohärenz – beide Texte sind inhaltlich zusammenhängend und gut verständlich formuliert; Kohärenz wird z.B. über Wiederaufnahmen erreicht: Napoleon – er</li> </ul>                                                                                                                                 | <ul style="list-style-type: none"> <li>Textlänge – in diesem Fall führt der größere Textumfang von E1 auch zu einer wesentlich detaillierteren Beschreibung als in E2</li> </ul>                                                                                                                                                                                                                                                                                           |

b) Angenommen, die Schüler\*innen der Klasse können aktuell den Erwartungshorizont 2 erfüllen, welche Unterstützung könnte ihnen dabei helfen, auch den Erwartungshorizont 1 zu erfüllen? Ggf. können Sie auch die Aufgabenstellung noch einmal anpassen.

Bitte beachten Sie, dass für diese Aufgabe selbstverständlich zahlreiche individuelle Lösungen möglich sind. Nachfolgend finden Sie einen Lösungsvorschlag, der zur Orientierung dient.

- Allgemeine Hinweise zum Aufbau einer Bildbeschreibung sind nicht notwendig, da auch Erwartungshorizont 1 die zentralen Anforderungen diesbezüglich erfüllt, auch Formulierungshilfen (z.B. *im Vordergrund, im Hintergrund*) wären eher nicht zielführend
  - Arbeit mit Modelltexten bzw. Auszügen aus Modelltexten, die verglichen werden; z.B. Vergleicht die folgenden Sätze miteinander – welche Gemeinsamkeiten und Unterschiede findet ihr? Fändet ihr a. oder b. besser für eine Bildbeschreibung? Bitte begründet diese Einschätzung.
    - a. Auf dem Gemälde sieht man im Zentrum Napoleon Bonaparte, welcher auf einem weißen, sich aufbäumenden Pferd sitzt.
    - b. Auf dem Gemälde ist in der Mitte Napoleon Bonaparte zu sehen. Er sitzt auf einem weißen Pferd.
  - Übung zu komplexen Nominalphrasen (z.B. erhalten die Schüler\*innen die Aufgabe, ausgewählte Details des Bildes in einer Nominalphrase, also nicht in einem Satz, so detailliert wie möglich zu beschreiben)
  - Wortschatzentlastung (z.B. Wortlisten und Wortnetze; vgl. auch Kapitel zu Wortschatzarbeit), wobei ausschließlich der Wortschatz thematisiert werden sollte, den die Schüler\*innen auch in der Textproduktion verwenden sollen und möglichst viele Wortarten berücksichtigt werden sollten z.B. Nomen, Komposita, Verben, Adjektive, Konnektoren
  - Sprachbildung für Fortgeschrittene: Thematisierung der Passiversatzformen *sich lassen + Infinitiv* (z.B. als Alternative für *man*) und deren Funktion und Bedeutung für Bildbeschreibungen
2. *Projektaufgabe: Wählen Sie für ein Thema Ihres Unterrichtsfaches eine Aufgabenstellung, die einen sprachlichen Operator (beschreiben, erklären, begründen...) beinhaltet. Formulieren Sie den Erwartungshorizont für diese Aufgabe aus und identifizieren Sie die notwendigen sprachlichen Mittel auf Wort-, Satz- und Textebene.*

Für diese Aufgabe gibt es zahlreiche individuelle Lösungen. Idealerweise können Sie sich über diese mit Kommiliton\*innen und/oder Kolleg\*innen austauschen, ggf. auch im Rahmen von universitären Seminarsitzungen.

## 9. Erfassung aufgabenbezogener Sprachkompetenz im Fachunterricht: Formative sprachliche Diagnostik

### Aufgaben vor dem Lesen

1. *Lesen Sie die nachfolgenden Aussagen und überlegen Sie, welche Haltung bzw. Erfahrung Sie diesbezüglich haben. Diskutieren Sie auch gerne mit Kommiliton\*innen und/oder Kolleg\*innen.*

Bei dieser Aufgabe gibt es individuelle Lösungen und es geht um Ihre persönliche Haltung.

Im Rahmen des Kapitels wird herausgearbeitet, dass alle Lehrer\*innen formative sprachliche Diagnostik durchführen können sollten, da diese für die Planung und Umsetzung eines sprachbildenden Unterrichts von großer Bedeutung ist und weil Untersuchungen zeigen, dass Lehrer\*innen häufig nicht ausschließlich den Inhalt bewerten, wenn es um Benotungen geht, sondern (in vielen Fällen unbewusst) auch die sprachliche Form.

2. *Der folgende Text stammt von einem Schüler aus der 6. Klasse und ist im Biologieunterricht entstanden. Der Schreibauftrag lautete: „Beschreibt den Menstruationszyklus und verwendet die entsprechenden Fachbegriffe.“ Bitte richten Sie Ihren Blick auf die sprachlichen Stärken des Textes: Gibt es Sätze oder Formulierungen, die besonders gut gelungen sind und die z.B. von besonderer Kreativität oder sprachlichem Mut zeugen?*

Für diese Aufgabe gibt es verschiedene Lösungen. Nachfolgend finden Sie ein Beispiel. Weitere Hinweise finden Sie im Studienbuchkapitel. Häufig stehen Fehler und Schwächen von Schüler\*innentexten im Vordergrund. Mindestens ebenso wichtig sind jedoch Stärken. Auch diese sollten Lehrer\*innen kompetent identifizieren können.

Stärken im Text sind z.B.:

- Chronologische Darstellung des Menstruationszyklus' (Chronologie wird hergestellt über Reihenfolge des Texts)
- Verwendung von passendem Fachwortschatz (z.B. *Gebärmutterschleimhaut, Eisprung, Befruchtung, sich einnisten*)
- Besonders gelungene Formulierungen/Sätze: *Eine Eizelle reift im Eierstock an* – auch wenn *anreifen* als Verb nicht existiert, wird hier ein trennbares Verb verwendet, das strukturell komplexer ist als ein Simplexverb (wie z.B. *reifen*; vgl. auch das entsprechende Kapitel zu Herausforderung und Funktion von Sprache); hinzukommt, dass das trennbare Verb strukturell korrekt verwendet wird (getrennt); vermutlich ist jedoch *heranreifen* gemeint.
- ...

## Aufgaben nach dem Lesen

1. *Im gesellschaftswissenschaftlichen Unterricht einer fünften Klasse wurde folgende Aufgabe gestellt: Erkläre die Entstehung von Tag und Nacht! Ein Schüler schreibt dazu folgenden Text:*

|   |                                                                              |
|---|------------------------------------------------------------------------------|
| 1 | Die Erde ist eine Kugel deshalb wird nur eine Hälfte von der Erde von der    |
| 2 | Sonne geblendet und die andere ist im Schatten. Aber die Erde dreht sich     |
| 3 | auch immer. Wenn wir auf der Schatten Seite sind wird es Nacht und wenn      |
| 4 | die Erde sich dreht und wir auf der Seite sind wo die Sonne ist wird es Tag. |

- a) *Richten Sie Ihren Blick zunächst auf die sprachlichen Stärken des Textes: Gibt es Sätze oder Formulierungen, die besonders gut gelungen sind und die z. B. von besonderer Kreativität oder sprachlichem Mut zeugen?*

Für diese Aufgabe gibt es verschiedene Lösungen. Idealerweise können Sie sich über diese mit Kommiliton\*innen und/oder Kolleg\*innen austauschen, ggf. auch im Rahmen von universitären Seminarsitzungen. Nachfolgend finden Sie ein Beispiel.

- Eine Stärke im Bereich Syntax ist z.B. die komplexe Satzstruktur in den Zeilen 3-4: komplexe konditionale Satzkonstruktion mit dem Konnektor „wenn...“ (2x) und eingeschobenem Relativsatz (*und wenn... wir auf der Seite sind wo die Sonne ist wird es Tag.*).
- Verwendung von Präpositionalphrasen (*eine Hälfte von der Erde von der Sonne*, Z. 1-2, *auf der Schatten Seite*, Z. 3); diese stellen Verhältnisse und Beziehungen mit Blick auf das fachliche Thema dar und konkretisieren diese.
- *wird geblendet* – auch wenn die Verwendung des Verbs hier fachlich nicht ganz korrekt ist, stellt *blenden* jedoch ein eher niedrig-frequentes Verb dar, das im Text spezifizierend wirkt und vermutlich eine Annäherung an eine passendere Beschreibung, wie z.B. *Strahlen der Sonne treffen (nicht) auf die Erde, sonnenabgewandte vs. sonnenzugewandte/ sonnenbeschienene Seite, die Sonne beleuchtet die Erdkugel* darstellt. Zudem wird es im Rahmen in einer Passivkonstruktion verwendet.
- ...

- b) *Der Aufgabe liegt der folgende fachliche und sprachliche Erwartungshorizont zugrunde. Bitte beurteilen Sie, inwieweit mit dem Text oben diese fachlichen und sprachlichen Lehr-/Lernziele erreicht werden.*

Für diese Aufgabe gibt es individuelle Lösungen. Idealerweise können Sie sich über diese mit Kommiliton\*innen und/oder Kolleg\*innen austauschen, ggf. auch im Rahmen von universitären Seminarsitzungen. Nachfolgend finden Sie ein Beispiel.

| Fachliche Ziele                                                                           |                                                                                                                                                                                                                                                                                                                                                                                                                                                                                                                                                                                                                                                                                                                                                                                                                                                                                                                                                   |
|-------------------------------------------------------------------------------------------|---------------------------------------------------------------------------------------------------------------------------------------------------------------------------------------------------------------------------------------------------------------------------------------------------------------------------------------------------------------------------------------------------------------------------------------------------------------------------------------------------------------------------------------------------------------------------------------------------------------------------------------------------------------------------------------------------------------------------------------------------------------------------------------------------------------------------------------------------------------------------------------------------------------------------------------------------|
| <b>Schriftliche Erklärung, wie Tag und Nacht auf der Erde entstehen:</b>                  | Im Text wird erklärt, dass die Erde eine Kugel ist, dass die Sonne jeweils eine Hälfte anstrahlt und dass die Erde sich dreht. Mit zwei mit <i>wenn</i> eingeleiteten Nebensätzen und einer Relativsatzkonstruktion wird versucht, die Bedingungen der Entstehung von Tag und Nacht zu erklären (teilweise erfolgreich).                                                                                                                                                                                                                                                                                                                                                                                                                                                                                                                                                                                                                          |
| <b>Erwähnung der Erdrotation um die eigene Achse:</b>                                     | Der Schüler schreibt, dass sich die Erde dreht ( <i>Aber die Erde dreht sich auch immer</i> ). Dennoch fehlt eine präzise Formulierung, die deutlich macht, dass sich die Erde um die eigene Achse dreht.                                                                                                                                                                                                                                                                                                                                                                                                                                                                                                                                                                                                                                                                                                                                         |
| <b>Erwähnung, dass bei der Rotation immer nur eine Erdhälfte der Sonne zugewandt ist:</b> | In dem Text wird erwähnt, dass eine Hälfte der Erde beleuchtet wird, während die andere im Schatten liegt (vgl. Z. 1-2). Dabei ist die Erklärung etwas unpräzise, da sie nicht klar macht, dass dies ein kontinuierlicher Prozess ist, der durch die Rotation der Erde bestimmt wird.                                                                                                                                                                                                                                                                                                                                                                                                                                                                                                                                                                                                                                                             |
| <b>Erwähnung, dass eine Drehung 24 Stunden dauert:</b>                                    | Dieser Punkt wird im Text nicht erwähnt.                                                                                                                                                                                                                                                                                                                                                                                                                                                                                                                                                                                                                                                                                                                                                                                                                                                                                                          |
| Sprachliche Ziele                                                                         |                                                                                                                                                                                                                                                                                                                                                                                                                                                                                                                                                                                                                                                                                                                                                                                                                                                                                                                                                   |
| <b>Präzise, vollständige und verständliche Erklärung:</b>                                 | Grundsätzlich ist der Text verständlich und wesentliche Aspekte der Tag-Nacht-Entstehung werden erläutert. (siehe auch fachliche Ziele). An einigen Stellen ist die Formulierung ungenau bzw. unpassend (z.B. „blendet“ → dennoch wird mit <i>geblendet</i> versucht, etwas präzise auszudrücken). Passender wäre z.B. das Verb <i>beleuchten</i> . Durch die Verwendung des Verbs <i>werden</i> (Z. 4 und 5) wird der Zusammenhang zwischen Erddrehung und Tag und Nacht nur bedingt korrekt wiedergegeben. Es entsteht der Eindruck, dass die Entstehung von Tag und Nacht auf die Position der Menschen auf der Erde zurückzuführen ist (im Sinne von: Wann ist für die Menschen/uns Tag und Nacht?). Besser wäre eine Formulierung wie die folgende: <i>Die Sonne strahlt immer nur eine Hälfte der Erdkugel an. Auf der Hälfte, die sie anstrahlt, ist es hell und Tag. Auf der Seite, die sie nicht anstrahlt, ist es dunkel und Nacht.</i> |
| <b>Verwendung des passenden thematischen Wortschatzes:</b>                                | Es wird überwiegend passendes, jedoch basales Vokabular eingesetzt. Beispiele: Z. 1: <i>Kugel, Hälfte</i> , Z. 2: <i>Erde, Sonne, blenden, Schatten</i> , Z. 3 <i>sich drehen</i> . Komposita wie z.B. <i>Erdkugel, Erdachse</i> und Verben wie z.B. <i>beleuchten</i> und die Formulierung <i>um ihre eigene Achse</i> würden ggf. zu einer präzisieren und thematisch korrekteren Darstellung führen.                                                                                                                                                                                                                                                                                                                                                                                                                                                                                                                                           |



|                                                                         |                                                                                                                                                                                                                                                                                                                                                                                                                                                                                                                                                                                                                                                                                 |
|-------------------------------------------------------------------------|---------------------------------------------------------------------------------------------------------------------------------------------------------------------------------------------------------------------------------------------------------------------------------------------------------------------------------------------------------------------------------------------------------------------------------------------------------------------------------------------------------------------------------------------------------------------------------------------------------------------------------------------------------------------------------|
| <b>Darstellung des Zusammenhangs durch passende Satzkonstruktionen:</b> | In dem Text werden einfache Hauptsätze verwendet. Es werden Konnektoren zur Verdeutlichung komplexer Zusammenhänge verwendet. Zum Beispiel: Z. 1: <i>deshalb</i> , Z. 2: <i>und</i> , Z. 3: <i>Aber</i> ; <i>Wenn...</i> , Z. 4: <i>und wenn....</i> . Der Konnektor <i>deshalb</i> (Z. 1) macht deutlich, dass der folgende Sachverhalt als Folge des vorherigen Sachverhalts anzusehen ist. Das <i>aber</i> in Z. 2 ist semantisch unpassend (adversativ, d.h. ein Gegensatz zum Satz davor wird angezeigt, der in diesem Fall aber gar nicht vorliegt). Mit dem Konnektor <i>wenn</i> wird ausgedrückt, dass Tag und Nacht auf der Erde von bestimmten Bedingungen abhängen. |
| <b>Schreiben im Präsens:</b>                                            | Der Text ist korrekt im Präsens verfasst ( <i>ist, dreht sich</i> ).                                                                                                                                                                                                                                                                                                                                                                                                                                                                                                                                                                                                            |

c) *Leiten Sie im Sinne eines formativen sprachlichen Assessments (vgl. **Fehler! Verweisquelle konnte nicht gefunden werden.**) mögliche Förderimplikationen ab: Wie kann der Weg zum sprachlichen Lehr-/Lernziel erreicht werden? Welche sprachlichen Entwicklungsziele ergeben sich für den Schüler? Welches Feedback sollte er bekommen? Welche Scaffoldingmaßnahmen sind sinnvoll? Wie kann der Schüler seine Sprachkompetenz selbstständig ausbauen? Welche Unterstützung durch Mitschüler\*innen ist möglich?*

Für diese Aufgabe gibt es individuelle Lösungen. Idealerweise können Sie sich über diese mit Kommiliton\*innen und/oder Kolleg\*innen austauschen, ggf. auch im Rahmen von universitären Seminarsitzungen. Erste Hinweise finden sich auch im Kapitel. Nachfolgend finden Sie ein Beispiel.

Insgesamt ist es nicht einfach, auf Grundlage eines einzigen Textes weitreichende Entwicklungsziele und Förderimplikationen abzuleiten. In der Praxis stehen Lehrpersonen i.d.R. weitere diagnostische Informationen zur Verfügung, z.B. aus dem Unterrichtsgespräch. Wir nennen dennoch einige mögliche Aspekte.

Entwicklungsziele: Ein mögliches Entwicklungsziel könnte die Verwendung eines (noch) präziseren Wortschatzes sein. Auffällig ist in dem Text zudem die fehlende Kommasetzung, die gerade auch aufgrund des komplexen Satzbaus das Verständnis erschwert. Die Vermittlung von Kommaregeln ist allerdings nicht Aufgabe des gesellschaftswissenschaftlichen Unterrichts. Hier sollte eine Zusammenarbeit mit dem Deutschunterricht angestrebt werden.

Feedback: Die obige Tabelle kann als Grundlage für das Feedback an den Schüler dienen. Es werden sowohl die Stärken des Textes deutlich als auch bereits Hinweise für Verbesserungsmöglichkeiten gegeben. Dabei kann hervorgehoben werden, dass er bereits die Grundidee zur Ersterung von Tag und Nacht erfasst und verstanden hat. Er hat gezeigt, dass er weiß, dass sowohl die Erdrotation als auch die Position zur Sonne zentral sind, um das Phänomen zu erklären. Sprachlich kann positiv hervorgehoben werden, dass er bereits komplexe Sätze formuliert und es schafft, fachliche Zusammenhänge darstellt.

Scaffolding:

Maak, Diana/ Petersen, Inger (2025): Sprachbildung in allen Schulfächern der Sekundarstufe. Grundlagen, Konzepte und Methoden der germanistischen Linguistik und Sprachdidaktik. De Gruyter.

Man könnte dem Schüler Satzanfänge oder Formulierungshilfen anbieten sowie den zentralen Wortschatz (vgl. Ausführungen oben, Schwerpunkt hier sicher auf den Verben: *liegen* oder *sich befinden* statt *sein*; *sich ständig um die eigene Achse drehen* statt *sich immer drehen*; *anstrahlen* oder *beleuchten* statt *blenden*), der für eine fachlich präzisere Formulierung notwendig wäre, bereitstellen.

Selbstständiger Ausbau der Sprachkompetenz: Der Schüler könnte eine verbesserte Version seines eigenen Textes oder einen Modelltext von der Lehrperson erhalten und mit dem Original vergleichen (z.B. Was ist gleich geblieben? Welche sprachlichen Unterschiede gibt es? Hat sich dadurch auch der fachliche Inhalt geändert?). Diese Aufgabe dient einerseits dazu, ein positives Beispiel zu geben, das als Orientierung dienen kann und der Vergleich zeigt eigene Stärken auf und sensibilisiert im besten Fall für die Bedeutung möglichst präziser Sprachverwendung, um fachliche Sachverhalte korrekt auszudrücken. Ggf. könnte man auch eine Checkliste mit häufigen Fehlern (hier z.B. die fehlenden Kommata) zur eigenständigen Bearbeitung von Texten bereitstellen oder erarbeiten lassen. In diesem Zusammenhang könnte auch eine Zusammenarbeit mit dem Deutschunterricht sinnvoll sein.

Unterstützung durch Mitschüler\*innen: Die Schüler\*innen könnten ihre Texte durch gegenseitiges Feedback (z.B. im Rahmen einer Schreibkonferenz) optimieren, indem Texte ausgetauscht und mittels einer Kriterienliste überprüft werden. Daraufhin können die Lernenden ihre Texte überarbeiten. Eine weitere Möglichkeit besteht darin, dass die Schüler\*innen Kleingruppen arbeiten, in denen sie gemeinsam eine Erklärung schreiben und sich über die Auswahl der richtigen Fachbegriffe und Satzstrukturen austauschen.

## 10. Sprachbildendes Handeln in der Unterrichtsaktion

### Aufgaben vor dem Lesen

1. *„Wenn alles schläft und einer spricht, so nennt man dieses Unterricht.“ Denken Sie über diese Äußerung, die Wilhelm Busch zugeschrieben wird, nach: Hier wird angedeutet, dass ausschließlich eine Person – die Lehrkraft – spricht, während die Schüler\*innen anderen Tätigkeiten nachgehen, als dieser interessiert zuzuhören. Inwiefern deckt sich dies mit Erfahrungen aus Ihrer eigenen Schulzeit oder Unterrichtshospitationen?*

Da es um Ihre eigenen Erfahrungen geht, fällt die Antwort selbstverständlich individuell unterschiedlich aus. Basierend auf empirischen Untersuchungen zu diesem Thema müsste jedoch ein Großteil der Studienbuchleser\*innen diese Situation durchaus wiedererkennen und Ähnliches im eigenen Unterricht erlebt haben. Die Lehrkraft hat eine eher dominante Rolle inne und Schüler\*innen agieren vorwiegend als Zuhörende und gehen nebenbei anderen Tätigkeiten nach. Gleichzeitig haben Sie sicher auch andere Unterrichtserfahrungen gesammelt und an Unterricht teilgenommen, bei dem Interaktion und Schüler\*innenzentrierung im Fokus standen.

2. *Neben der verbalen spielt auch die nonverbale Kommunikation im Unterricht eine wichtige Rolle. Worauf sollte eine Lehrperson im Hinblick auf ihre Mimik und Gestik achten?*

Für diese Aufgabe gibt es zahlreiche individuelle Lösungen. Idealerweise können Sie sich über diese mit Kommiliton\*innen und/oder Kolleg\*innen austauschen, ggf. auch im Rahmen von universitären Seminarsitzungen. Nachfolgend finden Sie ein Beispiel.

Eine Lehrkraft sollte Aspekte der nonverbalen Kommunikation bewusst einsetzen, um ihre verbalen Aussagen zu unterstützen. Dabei sollte sie ihre nonverbale Kommunikation bewusst steuern, um Missverständnisse zu vermeiden. Gesten wie beispielsweise verschränkte Arme oder ein abwesender Blick könnten unbeabsichtigt Distanz zu den Lernenden schaffen. Außerdem sollte der Einsatz der nonverbalen Kommunikation situationsgerecht angepasst werden. Im Folgenden werden ausgewählte Aspekte zur Beachtung der nonverbalen Kommunikation im Hinblick auf die Gestik und Mimik vorgestellt. Dabei ist zu beachten, dass Gestik und Mimik selbstverständlich kontextspezifisch und situationsangemessen eingesetzt und dementsprechend variiert werden sollten.

Gestik: Die Lehrperson sollte eine offene Körperhaltung haben, die den Schüler\*innen signalisiert, dass sie für die Schüler\*innen zugänglich ist und ihre Aufmerksamkeit auf den Unterricht gerichtet ist. Daneben können Gestiken dazu beitragen, Inhalte zu verdeutlichen. Zum Beispiel können das Zeigen auf bestimmte Objekte oder das Verwenden von Handbewegungen, um Abläufe zu illustrieren, zum Verständnis der Schüler\*innen beitragen.

Mimik: Die Lehrperson kann durch einen gezielten Blickkontakt zu ihren Schüler\*innen deren Aufmerksamkeit steuern und einzelne Lernende direkt ansprechen. Des Weiteren kann der Einsatz der Mimik zur emotionalen Unterstützung der Lernenden beitragen, so dass beispielsweise ein Lächeln zur Ermutigung führen kann oder ein authentischer ernster Gesichtsausdruck die Ernsthaftigkeit der Lehrperson in bestimmten Situationen unterstreicht.

## Aufgaben nach dem Lesen

1. *Nachfolgend finden Sie die Mitschrift eines Unterrichtsgesprächs aus dem Fach Geschichte (Klasse 13; Thema Absolutismus, Beschreibung eines Gemäldes von Ludwig dem XIV.). Den Schüler\*innen war das Bild bereits aus der vorherigen Stunde bekannt.*
  - a) Das IRE-Muster kommt mehrmals zum Tragen (z.B. Initiation = *Welche Herrschaftssymbole...?*, - Reply = *Mantel mit Pelz*, Evaluation (hier positive Rückmeldung und damit Validierung der Schüler\*innenantwort) = *Ja, tatsächlich*) und ist in dem Auszug das vorherrschende Interaktionsmuster.
  - b) Die Lehrperson stellt ausschließlich konvergente Wissensfragen in diesem Gesprächsausschnitt. Es geht also um Faktenwissen und für die Fragen gibt es eindeutige Lösungen (zumindest aus Lehrpersonenperspektive). Zwar verwendet die Lehrperson überwiegend W-Fragen (*Welche Herrschaftssymbole.../ Was für ein.../ Von welchem.../ wieso eigentlich Pelz*); jedoch sind diese bis auf *wieso eigentlich Pelz* geschlossene Fragen. Interessant ist die Stelle, an der die Lehrperson die Antwort von S4 *Schaf?*, die bereits fragend formuliert wird, noch einmal fragend wiederholt – S4 begründet im Anschluss an diese seinen Vorschlag, interpretiert die Wiederholung der Lehrperson also als Aufforderung, den eigenen Antwortvorschlag näher auszuführen.
  - c) Das Gemälde war der Lerngruppe bereits bekannt und Ziel des Gesprächs war die Reaktivierung und Erweiterung von Wissen zum Absolutismus. Dementsprechend liegt der Fokus auf der detaillierten Beschreibung und Deutung von ausgewählten Elementen des Bildes. Insofern ist das IRE-Muster zunächst als funktional angemessen einzuschätzen. Gleichzeitig führt dessen Verwendung stellenweise dazu, dass das Gespräch eher wie ein Ratespiel wirkt – da die Schüler\*innen kein ausreichendes Vorwissen haben, raten sie, von welchem Tier der kostbare Pelz kommt (Eisbär, Löwe, Schaf). An dieser Stelle ist fraglich, wie zielführend das eng geführte Fragen tatsächlich ist. Zumal die Lehrperson keine Begründung für die Vorschläge einfordert, abgesehen ggf. vom Schaf. Diese könnten sicher mit Blick auf das Vorwissen der Schüler\*innen zeigen, dass Eisbär und Löwe durchaus nachvollziehbare Vorschläge darstellen (seltene, exotische Tiere und der Löwe wird oft als König der Tiere bezeichnet und wäre damit eine durchaus sinnvolle Wahl als Herrschaftssymbol) – zumindest im heutigen Kontext. Damit könnte die Brücke zur historischen Dimension und Entwicklung von Deutungen und Zuschreibungen geschlagen werden. Auch wenn schließlich S1 die korrekte Antwort beisteuern kann, wird doch recht viel Zeit darauf verwendet, falsche Antworten durchzugehen.

Ergänzender Hinweis: Die Studentin, die die Sequenz beobachtet und dokumentiert hat, hat darauf hingewiesen, dass die Stimmung in der Lerngruppe gut war – die saloppen, teilweise auch ironischen Kommentare der Lehrperson (*der berühmte französische Eisbär*) also ihrer Einschätzung nach den Schüler\*innen nicht unangenehm waren.

2. *Schätzen Sie die Mitschrift des obigen Unterrichtsgesprächs aus Aufgabe 1) auf Basis der nachfolgenden Checkliste (nach Thürmann & Vollmer 2013; angepasst und gekürzt) ein.*

Für diese Aufgabe sind Sie ggf. zu abweichenden Einschätzungen gekommen; dies kann in Abhängigkeit von Ihrer Argumentation ggf. auch passend sein.

| Merkmale                                                                                                                                                                     | Zutreffend?<br>Notizen/ Kommentare                                                                                                                                                                                                                                                                                                                                                                                                                                                                                                                                                                                                                                                                                |
|------------------------------------------------------------------------------------------------------------------------------------------------------------------------------|-------------------------------------------------------------------------------------------------------------------------------------------------------------------------------------------------------------------------------------------------------------------------------------------------------------------------------------------------------------------------------------------------------------------------------------------------------------------------------------------------------------------------------------------------------------------------------------------------------------------------------------------------------------------------------------------------------------------|
| Im Unterricht verwende ich sprachliche Mittel sehr bewusst. Ich wähle ein für die jeweilige Unterrichtssituation angemessenes sprachliches Register.                         | <input type="checkbox"/> Trifft zu<br><input type="checkbox"/> Trifft eher zu<br><input checked="" type="checkbox"/> Trifft eher nicht zu<br><input type="checkbox"/> Trifft nicht zu<br>Vermutlich ist sich die Lehrperson ihrer Sprache bewusst (z.B. betont saloppe, eher umgangssprachliche Antwort zum Vorschlag Eisbär <i>Naja, also wohl eher nicht...</i> ); die Frage ist eher, wie angemessen das in der Unterrichtssituation ist – bedenkt man, dass es sich um eine 13. Klasse handelt, wäre insgesamt eventuell ein elaboriertere, eher bildungs- und fachsprachlich orientierte Sprachverwendung angemessener.                                                                                      |
| Die Schüler*innen erhalten durch mich ein sprachliches Vorbild, um ihr Repertoire von fachunterrichtlich relevanten sprachlichen Mustern und Strukturen erweitern zu können. | <input type="checkbox"/> Trifft zu<br><input type="checkbox"/> Trifft eher zu<br><input checked="" type="checkbox"/> Trifft eher nicht zu<br><input type="checkbox"/> Trifft nicht zu<br>Siehe Einschätzung erster Aspekt; tatsächlich finden sich wenige sprachliche Muster, die den Schüler*innen als Orientierung oder Vorbild dienen können (ggf. <i>Welche Herrschaftssymbole ... erkennen?</i> , außerdem <i>Ludwig trägt hier den Krönungsmantel mit Pelzbesatz.</i> ). Diese werden jedoch von den Schüler*innen nicht aufgegriffen in diesem Gesprächsausschnitt. Dafür werden aber Formulierungen aus den Schüler*innenantworten von der Lehrperson wieder aufgegriffen und damit als passend markiert. |
| Ich kontrolliere meinen Redeanteil im Unterricht, so dass den Schüler*innen mehr Zeit für eigene Beiträge bleibt.                                                            | <input type="checkbox"/> Trifft zu<br><input type="checkbox"/> Trifft eher zu<br><input checked="" type="checkbox"/> Trifft eher nicht zu<br><input type="checkbox"/> Trifft nicht zu<br>Die Lehrperson hat den größten Redeanteil in dieser Gesprächssequenz. Jedoch unterbricht sie Schüler*innen, die etwas sagen, nicht, sondern lässt sie ausreden (z.B. S4s Begründung zum Vorschlag Schaf).                                                                                                                                                                                                                                                                                                                |
| Meine Fragen und Impulse an die Schüler*innen sind offen gestaltet, so dass sie nicht mit einzelnen Wörtern oder Gesten reagieren können.                                    | <input type="checkbox"/> Trifft zu<br><input type="checkbox"/> Trifft eher zu<br><input checked="" type="checkbox"/> Trifft eher nicht zu<br><input type="checkbox"/> Trifft nicht zu<br>Vgl. auch Antworten zur 1. Aufgabe                                                                                                                                                                                                                                                                                                                                                                                                                                                                                       |

Maak, Diana/ Petersen, Inger (2025): Sprachbildung in allen Schulfächern der Sekundarstufe. Grundlagen, Konzepte und Methoden der germanistischen Linguistik und Sprachdidaktik. De Gruyter.

3. *Beobachten Sie die Sprachverwendung von Lehrer\*innen im Unterricht – entweder Sie hospitieren bei Kolleg\*innen oder nutzen eine videographierte Unterrichtsstunde (vgl. z.B. das Meta-Videoportal unter <https://www.unterrichtsvideos.net/metaportal/>; Hinweis: Sie müssen Sie sich für dieses Portal anmelden. Ggf. können Sie auch eine Seminarsitzung an der Universität beobachten. Nutzen Sie dafür als Grundlage die Checkliste nach Thürmann & Vollmer (2013; angepasst und gekürzt) aus Aufgabe 2).*

Für diese Aufgabe gibt es zahlreiche individuelle Lösungen. Idealerweise können Sie sich über diese mit Kommiliton\*innen und/oder Kolleg\*innen austauschen, ggf. auch im Rahmen von universitären Seminarsitzungen.

## 11. Wortschatzarbeit in allen Unterrichtsfächern

### Aufgaben vor dem Lesen

1. Die folgende Aufgabe soll Ihnen zeigen, wie das „Lexikon“ in Ihrem Kopf funktioniert. Sie haben pro Aufgabe 1 Minute Zeit.

Für diese Aufgabe gibt es zahlreiche individuelle Lösungen. Es gibt dementsprechend kein Richtig oder Falsch. Nachfolgend finden Sie das Beispiel einer Studentin.

- a) Hund, Katze, Maus, Meerschwein, Hamster, Pferd, Kuh, Schaf, Wolf, Kaninchen, Fisch, Wal, Hai, Schildkröte, Kamel, Wurm, Käfer, Raupe, Assel, Schmetterling, Biene, Hummel, Wespe, Hornisse, Vogel
- b) Haus, Hund, holen, heute, hauen, heiter, Hirte, Hirtenkäse, Himmel, Hölle, Hoffnung, Haut, Haare, Hase, Hummel, Hornisse, Hamburg, hinter, Hilfe, Hallo, holprig, Handy, Hafer, Hauptbestandteile, Hauptsache
- c) Kran, braun, blau, Drache, draußen, Drama, drastisch, Draht, Blatt, Blattläuse, Blase
- d) Hummel, Hase, Hallo, Himmel, Jacke, Hose, Socke, Schuhe, Bluse, Haare, Gesicht, Auge, Nase, Rücken, Beine, Füße, tanzen, laufen, singen, springen, reden, sprechen, rufen, schreien, lesen, schneiden, schmieren  
hässlich, langsam, niedrig, leise, klein

2. Betrachten Sie die Ergebnisse aus Aufgabe 1 noch einmal. Ordnen Sie diese nach Schwierigkeitsgrad (– schwere Aufgabe, + einfache Aufgabe). Überlegen Sie, was die Ergebnisse über die Ordnung der Wörter in Ihrem Kopf verraten.

|    |                                                                                                                                                                                                                                                                                                                                                                                                                                                                                                                                                                                                                                                                                              |
|----|----------------------------------------------------------------------------------------------------------------------------------------------------------------------------------------------------------------------------------------------------------------------------------------------------------------------------------------------------------------------------------------------------------------------------------------------------------------------------------------------------------------------------------------------------------------------------------------------------------------------------------------------------------------------------------------------|
| a) | <p>+</p> <p><u>Begründung:</u><br/>Als mir das erste Tier eingefallen ist, sind mir dann direkt weitere Tiere eingefallen.<br/><u>Hypothese:</u> Sobald eine „Kategorie“ abgerufen wird (z.B. hier Heimtier), werden weitere mit dem Oberbegriff vernetzte Tierarten im mentalen Lexikon aktiviert und sind schnell zugänglich. Das liegt daran, dass in semantischen Netzen gespeichert wird.</p>                                                                                                                                                                                                                                                                                           |
| b) | <p>+</p> <p><u>Begründung:</u><br/>Als mir ein Wort mit einem H als Anfangsbuchstabe eingefallen ist, sind mir dann direkt weitere Wörter mit H als Anfangsbuchstaben eingefallen. Dabei kam z.B. keine bestimmte Wortart besonders häufig vor, dachte ich – aber es waren doch hauptsächlich Nomen und Verben.<br/><u>Hypothese:</u><br/>Wörter, die mit einem bestimmten Buchstaben beginnen, sind ggf. leichter abzurufen, da – sobald die entsprechende ‚Suche‘ aktiviert ist – entsprechende Verbindungen im mentalen Lexikon aktiviert werden. Da auch die Form &lt;H&gt;/&lt;h&gt; abgespeichert wird, ist der Zugriff auf Wörter mit dem gleichen Anfangsbuchstaben erleichtert.</p> |
| c) | -                                                                                                                                                                                                                                                                                                                                                                                                                                                                                                                                                                                                                                                                                            |

|    |                                                                                                                                                                                                                                                                                                                                                                                                                                                                                                                                                                                                                                                                                                                                                                                                                                                             |
|----|-------------------------------------------------------------------------------------------------------------------------------------------------------------------------------------------------------------------------------------------------------------------------------------------------------------------------------------------------------------------------------------------------------------------------------------------------------------------------------------------------------------------------------------------------------------------------------------------------------------------------------------------------------------------------------------------------------------------------------------------------------------------------------------------------------------------------------------------------------------|
|    | <p><u>Begründung:</u><br/>Als mir ein Wort eingefallen ist, das an der dritten Stelle ein &lt;a&gt; hat, ist mir nicht direkt ein neues Wort mit &lt;a&gt; an dritter Stelle eingefallen. Wörter, die mir dann als nächstes eingefallen sind, mussten zunächst segmentiert und hinsichtlich der Buchstaben analysiert werden.</p> <p><u>Hypothese:</u><br/>Das Abrufen von Wörtern basierend auf einer bestimmten Position eines Buchstabens erfordert eine genaue Analyse der Wortstruktur. Wörter sind ggf. nicht nach ihrer Buchstabenanordnung im Mentalen Lexikon gespeichert. Sobald man aber eine Kombination wie z.B. &lt;spa&gt;/&lt;sta&gt; aktiviert hat, die viele passende Wörter produziert hat, fällt es wesentlich leichter, weitere Wörter mit einer ähnlichen Bauweise im mentalen Lexikon zu aktivieren (z.B. Stadt, Stapel, Start).</p> |
| d) | <p>-</p> <p><u>Begründung:</u><br/>Bei der Aufzählung von zweisilbigen Wörtern sind mir hauptsächlich kurze Wörter eingefallen, die dann erst segmentiert und hinsichtlich ihrer Silbenstruktur analysiert werden mussten. Dabei sind mir oft kurze Wörter eingefallen, die aber nur einsilbig waren.</p> <p><u>Hypothese:</u><br/>Das Zählen von Silben erfordert eine bewusste Analyse der Wortstruktur und könnte demnach komplexer sein als einfaches Abrufen von Wörtern nach z.B. einer bestimmten Kategorie.</p>                                                                                                                                                                                                                                                                                                                                     |
| e) | <p>+/-</p> <p><u>Begründung:</u><br/>Bei insgesamt vier von den fünf Adjektiven fiel es mir leicht, das Gegenteil zu finden und aufzuschreiben.</p> <p><u>Hypothese:</u><br/>Da diese frequenten Adjektive und ihre Gegenteile oft im gleichen Kontext verwendet werden ist die Verbindung im mentalen Lexikon stark, sodass der Zugriff erleichtert ist.</p>                                                                                                                                                                                                                                                                                                                                                                                                                                                                                               |

3. Inwiefern stimmen Sie den folgenden Aussagen von Lehrkräften zu? Bitte begründen Sie Ihre Einschätzung.

Für diese Aufgabe gibt es verschiedene individuelle Lösungen. Nachfolgend finden Sie ein Beispiel.

- a) Während der Deutschunterricht eine essentielle Rolle bei der Förderung von sprachlichen Kompetenzen in den Bereichen „Sprechen und Zuhören“, „Schreiben“, „Lesen- mit Texten und Medien umgehen“ und „Sprache und Sprachgebrauch untersuchen“ (in Schleswig-Holstein) spielt, ist die Entwicklung des Wortschatzes in verschiedenen Fächern zentral. Dies ist darin zu begründen, dass in jedem Fach ein fachspezifischer Wortschatz in unterschiedlichen Kontexten erworben werden kann.
- b) Grundlegend ist die Aussage der Lehrkraft nachvollziehbar, da sowohl der Zeitdruck (gerade zu Beginn der Lehrtätigkeit) für die Planung als auch für die Durchführung des Unterrichts eine Herausforderung darstellen kann. Gleichzeitig stellt die der Erwerb von (Fach-)Wortschatz fast immer ein Lehrziel von Unterricht dar und ist zentral für fast jeden Unterricht. Demnach ist es sinnvoll, dass systematisch über Wortschatzarbeit und deren



Berücksichtigung im Unterricht reflektiert wird. Durch Übung und Einspielen einer Routine beim Planen und Durchführen lässt sich Wortschatzarbeit schnell und zielführend im Unterricht einsetzen.

- c) Diese Aussage einer Lehrkraft zeigt ihre Bemühung, ihren Schüler\*innen zentrale Fachwörter in ihrem Unterricht zu vermitteln. Dennoch ist es wichtig zu beachten, dass Wortschatzarbeit mehr als das Anschreiben und Erklären von Fachwörtern umfasst und auch Strategien zur Förderung des allgemeinen Wortschatzes beinhaltet. Nur durch das Anschreiben und Erklären von Fachwörtern werden diese nicht automatisch von den Schüler\*innen in ihren rezeptiven oder produktiven Wortschatz übernommen.

## Aufgaben nach dem Lesen

1. *Im Text wurde für Geschichte bereits angedeutet, dass der (Fach-)Wortschatz in diesem Fach spezifische Merkmale aufweist. Lesen Sie die folgenden Hinweise zu ausgewählten Merkmalen historischer Begriffe. Überlegen Sie für Ihr bzw. ein weiteres Ihrer Fächer, ob sich ähnliche fachspezifische Merkmale beschreiben lassen.*

Für diese Aufgabe gibt es zahlreiche individuelle Lösungen. Nachfolgend finden Sie das Beispiel einer Studentin zum Fach Biologie.

### *Biologische (Fach-)Begriffe*

- sind oft eigenständige, nur im Kontext der Biologie (oder anderer Naturwissenschaften) verwendete Wörter (z.B. *Photosynthese, Meiose, Mitose*)
  - werden häufig in der Alltagssprache verwendet, allerdings ggf. mit anderer Bedeutung, und sind dadurch mehrdeutig und werden ggf. nicht als erklärungsbedürftig erkannt (z.B. *Energie, Zelle, Blatt*)
  - sind oft Oberbegriffe, die durch spezifisches Fachwissen näher beschrieben und definiert werden können. So beschreiben Fachleuten z.B. ein Ökosystem durch bestimmte Eigenschaften näher, sodass unterschiedliche Ökosystem (z.B. Wüste und Wald) voneinander abgegrenzt werden können.
  - können je nach Fachgebiet der Biologie unterschiedliche Bedeutungen haben, beispielsweise *Population* in der Genetik oder Ökologie. Schüler\*innen sollte bewusst gemacht werden, dass Begriffe kontextabhängig variieren können, um Missverständnisse zu vermeiden und die Vielschichtigkeit der Biologie zu verstehen. Das bedeutet auch, dass Schüler\*innen auf Begriffe treffen, die sie vermeintlich (und sogar aus dem Biologieunterricht selbst) kennen, die jedoch tatsächlich in einer anderen Bedeutung auftreten.
  - entstammen oft aus anderen Sprachen wie z.B. aus dem Griechischen (z.B. *Chloroplast, Eukaryot*).
2. *Kurtz et al. (2014) konstatieren, dass Schüler\*innen im Mathematikunterricht zu einem fachlichen Thema mit Textaufgaben konfrontiert werden, die sehr unterschiedlichen Wortschatz- und Wissensbereichen entstammen, wie exemplarisch die nachfolgenden Aufgaben zum mathematischen Thema Rechnen mit Flächeninhalten zeigen. Das ist*

Maak, Diana/ Petersen, Inger (2025): Sprachbildung in allen Schulfächern der Sekundarstufe. Grundlagen, Konzepte und Methoden der germanistischen Linguistik und Sprachdidaktik. De Gruyter.

*insofern problematisch, als dass damit Welt- und Sprachwissen überprüft wird, das eigentlich nichts mit dem mathematischen Thema zu tun hat. Bitte identifizieren Sie das Welt- und Sprachwissen, das in der folgenden Aufgabe für das vollständige Verständnis des Aufgabentextes notwendig ist.*

(Implizites) Sprachwissen beispielweise über...

- Syntax (z.B. Satzreihen, Satzgefüge)
- Komposita (z.B. *Sumpfbgebiet*)
- Partikel- und Präfixverben (z.B. *abernten, gestellt*)
- Nominalisierungen (z.B. *Bestreben*)
- Passiv (z.B. Aufgabe 1)
- Verständnis und Konzepte für Begriffe wie *Naturschutz, Sumpfbgebiet, Bürgerinitiative, Holzerzeugung, Reihenhäuser, Baugesellschaft, Grundstück, Bauplatz, Mähdrescher*, usw...

Das Sprachwissen geht einher mit Weltwissen über beispielsweise...

- Kenntnisse über Naturschutz und die Bedeutung von Naturschutzgebieten
- Wissen darüber, was Bürgerinitiativen sind und wie diese agieren bzw. funktionieren (können)
- Grundlegendes Wissen über Waldnutzung, insbesondere in Bezug auf Holzerzeugung
- Wissen über landwirtschaftliche Fahrzeuge (z.B. *Mähdrescher*)
- Wissen über Arten von Häusern (z.B. Reihnhaus vs. Einfamilienhaus)
- Vertrautheit mit landwirtschaftlichen und ökologischen Fragestellungen
- Kenntnisse über die Größenordnung von Flächenangaben (zum Beispiel *Hektar* als Maßeinheit)

3. *Nachfolgend finden Sie eine Auswahl von Vorschlägen für Wortschatzübungen im Fachunterricht. Überlegen Sie bitte, für welche Lehr-/Lernziele die Methode sinnvoll ist und ob Sie diese Methode bereits nutzen oder ausprobieren möchten.*

Ob Sie diese Methode bereits genutzt haben oder nicht und ob Sie diese ausprobieren möchten, ist natürlich Ihrer persönlichen Einschätzung überlassen. Daher finden sich nachfolgend lediglich Hinweise dazu, wann die Arbeit mit der jeweiligen Methode/ Aufgabe/ Übung sinnvoll ist. Diese sind nicht erschöpfend.

| Methode/ Aufgabe/ Übung                                                                                                                              | Sinnvoll für folgende Lehr-/Lernziele:                                                                                                                                                                                                                                                                                                                                                                                                                                                         |
|------------------------------------------------------------------------------------------------------------------------------------------------------|------------------------------------------------------------------------------------------------------------------------------------------------------------------------------------------------------------------------------------------------------------------------------------------------------------------------------------------------------------------------------------------------------------------------------------------------------------------------------------------------|
| 1. Begriffe definieren mit Tabuwörtern (auf einer Begriffskarte werden drei bis fünf Wörter notiert, die nicht zur Definition genutzt werden dürfen) | Da Schüler*innen trotzdem die Wörter lesen, die nicht verwendet werden, werden semantische Netze im mentalen Lexikon gestärkt, sodass die relevanten Begriffe nicht kontextlos gelernt werden. Die Erklärung mit anderen/eigenen Worten ermöglicht ferner eine gute Verankerung und aktive Auseinandersetzungen durch das Übersetzen in alternative Formulierungen. Die Übung bietet sich an, wenn Fachbegriffe bereits erworben worden sind, also eher zur Festigung. Ideal ist es auch, wenn |

| Methode/ Aufgabe/ Übung                                                                       | Sinnvoll für folgende Lehr-/Lernziele:                                                                                                                                                                                                                                                                                                                                                                                                                                                                                                                                                                                                                                                                                                                                                                                                                                             |
|-----------------------------------------------------------------------------------------------|------------------------------------------------------------------------------------------------------------------------------------------------------------------------------------------------------------------------------------------------------------------------------------------------------------------------------------------------------------------------------------------------------------------------------------------------------------------------------------------------------------------------------------------------------------------------------------------------------------------------------------------------------------------------------------------------------------------------------------------------------------------------------------------------------------------------------------------------------------------------------------|
|                                                                                               | Schüler*innen selbst Tabukarten erstellen, da sie so über die Fachbegriffe reflektieren.                                                                                                                                                                                                                                                                                                                                                                                                                                                                                                                                                                                                                                                                                                                                                                                           |
| 2. Verschiedene Definitionen und Paraphrasierungen von Fachbegriffen vergleichen und bewerten | Wenn Schüler*innen isoliert Definitionen auswendig lernen, dann ist unklar, ob sie diese wirklich verstehen. Ein Vergleich regt dazu an, sich auszutauschen und ggf. auch Fragen zu stellen. Die Schüler*innen sollten bereits über Vorwissen verfügen, damit sie sich auch ausreichend kompetent austauschen können. Ggf. können auch Definitionen zu Beginn einer Einheit präsentiert werden mit der Frage, ob die Schüler*innen glauben, dass diese korrekt sind. Im Laufe der Einheit können diese dann erneut besprochen werden.                                                                                                                                                                                                                                                                                                                                              |
| 3. Lückentexte                                                                                | Lückentexte können einerseits Modellfunktion (Formulierungen) haben und zur Wiederholung dienen, z.B. im Anschluss an die Arbeit mit Schulbuchtexten oder die mündliche Besprechung im Unterrichtsplenum. Daher sollten sie zum Üben eingesetzt werden, wenn Schüler*innen bereits Wissen über die Fachbegriffe erworben haben.                                                                                                                                                                                                                                                                                                                                                                                                                                                                                                                                                    |
| 4. Korrektur von fachsprachlich fehlerhaften Texten                                           | Viele Studierende befürchten, dass Schüler*innen so Falsches lernen. Da solche Übungen tatsächlich anspruchsvoll sind, sollten sie erst eingesetzt werden, wenn Fachbegriffe bereits eingeführt worden sind. Gleichzeitig zeigt die Erfahrung, dass der Perspektivwechsel (sonst werden Fehler i.d.R. bei den Schüler*innen gesucht) eine willkommene Abwechslung darstellt, auch zur Frage, ob denn alles im Lesetext verstanden worden sei. Gleichzeitig ist genaues Lesen und Nachdenken gefordert, weil die Schüler*innen wissen, dass es Fehler gibt. Das gemeinsame Vergleichen und Besprechen dieser Übung führt häufig zu interessanten Gesprächen und gibt Hinweise darauf, was Schüler*innen nicht oder miss-verstanden haben – etwa, wenn von Schüler*innen Fehler identifiziert werden, die gar keine sind bzw. nicht intentional in den Text aufgenommen worden sind. |
| 5. Zuordnungsübungen                                                                          | Diese Übungen dienen der besseren Verankerung im mentalen Lexikon und eignen sich gut zur Wiederholung bzw. zum Üben. Falls erwartbar ist, dass bereits Vorwissen zum Thema vorhanden ist, handelt es sich auch um gute Übungen vor dem Lesen (Vorwissensaktivierung) bzw. zur Wortschatzaktivierung zu Beginn der Beschäftigung mit einem Thema.                                                                                                                                                                                                                                                                                                                                                                                                                                                                                                                                  |
| 6. Wortfamilien und Wortfelder anlegen                                                        | Diese Übungen dienen der besseren Verankerung und Vernetzung im mentalen Lexikon und eignen sich gut zur                                                                                                                                                                                                                                                                                                                                                                                                                                                                                                                                                                                                                                                                                                                                                                           |

| Methode/ Aufgabe/ Übung                                                                 | Sinnvoll für folgende Lehr-/Lernziele:                                                                                                                                                                                                                                                                                                                                                                                                                                                                                                                                                                                                                                                                   |
|-----------------------------------------------------------------------------------------|----------------------------------------------------------------------------------------------------------------------------------------------------------------------------------------------------------------------------------------------------------------------------------------------------------------------------------------------------------------------------------------------------------------------------------------------------------------------------------------------------------------------------------------------------------------------------------------------------------------------------------------------------------------------------------------------------------|
|                                                                                         | Wiederholung bzw. zum Üben. Idealerweise werden Wortfelder im Unterricht nach und nach (gemeinsam) ausgebaut. Zentrale Begriffe können also von Beginn der Einheit z.B. auf einem Plakat festgehalten und Wortfamilien und -felder nach und nach erweitert werden. Gegen Ende der Unterrichtseinheit können sie dann als Grundlage für das Erstellen von eigenen Übungen oder schriftlichen Texten dienen.                                                                                                                                                                                                                                                                                               |
| 7. Begriffsnetze bilden, ggf. Erweiterung (z.B. im Sinne von Concept Maps)              | Diese Übungen dienen der besseren Verankerung und Vernetzung im mentalen Lexikon und dem Verstehen fachlicher Zusammenhänge. Zudem ermöglichen sie das Lernen mit verschiedenen Sinnen, wenn Karten (analog oder digital) hin- und hergeschoben werden und tatsächlich begriffen werden können. Solche Netze können das fachliche Thema idealerweise verdichtet und gleichzeitig übersichtlich darstellen. Solche Übungen können also durchaus auch zur Erarbeitung der fachlichen Inhalte genutzt werden. Ebenso sind sie zur Wiederholung und Festigung geeignet. Sinnvoll ist es, im Anschluss an solche Übungen die Darstellungsform wechseln zu lassen (z.B. mündliche oder schriftliche Erklärung) |
| 8. hierarchische Ober- und Unterbegriffe in eine vorgegebene Grafik einsortieren lassen | Diese Übungen dienen der besseren Verankerung im mentalen Lexikon und eignen sich gut zur Wiederholung bzw. zum Üben.                                                                                                                                                                                                                                                                                                                                                                                                                                                                                                                                                                                    |
| 9. „Übersetzungsübungen“ – von Allgemeinsprache in Fachsprache übersetzen und umgekehrt | Diese Übung dient einerseits als kritische Reflexion mit Blick auf Form und Inhalt von Sprache. Gleichzeitig kann sie Schüler*innen sensibilisieren für Merkmale von Fachsprache. Die Übung erfordert eine aktive Auseinandersetzung mit den Texten und dient daher der besseren Vernetzung und Verankerung im mentalen Lexikon. Sie sollte eingesetzt werden, wenn Schüler*innen bereits Wissen zu den relevanten Fachbegriffen erworben haben.                                                                                                                                                                                                                                                         |
| 10. Multiple-Choice-Fragen beantworten                                                  | Diese Übungen dienen der besseren Verankerung im mentalen Lexikon und eignen sich gut zur Wiederholung bzw. zum Üben.                                                                                                                                                                                                                                                                                                                                                                                                                                                                                                                                                                                    |

## 12. Sprechen und Zuhören in allen Unterrichtsfächern

### Aufgaben vor dem Lesen

1. *Im Unterricht, aber auch zur eigenständigen Vor-/Nachbereitung von Unterricht und Prüfungen, dienen vielen Schüler\*innen Erklärvideos. MrWissen2go Geschichte (Mirko Drotschmann) z.B. hat 1.290.000 Abonnent\*innen auf YouTube (Stand 03/2024). Sehen Sie sich das Video Dolchstoßlegende: Darum war sie so verheerend (<https://www.youtube.com/watch?v=Jyto13xPzWY>) an. Überlegen Sie beim Ansehen:*
  - a) Mirko Drotschmann spricht deutlich, nicht zu schnell. Gleichzeitig ist der Inhalt durchaus anspruchsvoll, sodass ein gut ausgebauter Wortschatz eine wichtige Voraussetzung dafür ist, das Gesagte zu verstehen.
  - b) Die Bilder alleine reichen nicht aus, um die Inhalte des Videos zu verstehen, da die wesentlichen Informationen über das Gesagte, zu Hörende, transportiert werden; insbesondere, wenn man lediglich den sprechenden Mirko Drotschmann sieht. Die Bilder haben im Video also eher eine unterstützende Funktion.
  - c) Vgl. auch Ausführungen im Kapitel zu den Untertiteln. Eine verlangsamte Wiedergabe kann ggf. das Hören erleichtern, insbesondere wenn Personen sehr schnell, eine für die Hörenden nicht so gut verständliche Varietät sprechen oder die Hörenden Deutsch auf einem Niveau B2 und niedriger sprechen. Wenn die Wiedergabe zu langsam ist, dann belastet dies das Arbeitsgedächtnis und es ist schwer, Verstehensinseln zu bilden und dem Gehörten zu folgen.
2. *Kommen Präsentationen von Schüler\*innen in Ihrem Fach bzw. Ihren Fächern vor? Was kennzeichnet gelungene Präsentationen? Formulieren Sie Kriterien.*

Für diese Aufgabe gibt es zahlreiche individuelle Lösungen. Idealerweise können Sie sich über diese mit Kommiliton\*innen und/oder Kolleg\*innen austauschen, ggf. auch im Rahmen von universitären Seminarsitzungen. Nachfolgend finden Sie zunächst allgemeine Anforderungen, die in fast allen Fächern gelten sowie ein kurzes Beispiel für eine fachspezifische Lösung für das Fach Biologie.

Je nach Fach und Klassenstufe können die Anforderungen an eine Präsentation variieren. Im Folgenden sind grundlegend Aspekte aufgeführt, die für eine gelungene Präsentation gelten können.

- Klarer Aufbau und Struktur der Präsentation
- Fließende Übergänge zwischen einzelnen Abschnitten
- Thema ist gründlich recherchiert und fundiert dargestellt
- Angemessener Einsatz von Medien wie z.B. Folien, Bildern oder Diagrammen
- Gestaltung der Präsentation (z.B. Plakat oder Powerpointpräsentation) übersichtlich, ordentlich, nicht zu überladen mit Text
- Körperhaltung ist offen und selbstbewusst (Kein Bedecken von Plakaten oder anderen Formen der Präsentation)

Maak, Diana/ Petersen, Inger (2025): Sprachbildung in allen Schulfächern der Sekundarstufe. Grundlagen, Konzepte und Methoden der germanistischen Linguistik und Sprachdidaktik. De Gruyter.

- Blickkontakt zu den Zuhörenden
- Passende Lautstärke, Geschwindigkeit und Aussprache
- Freies Sprechen (Unterstützt durch z.B. Karteikarten)
- Sprechen in vollständigen Sätzen
- Fachlich präzise, aber auch verständliche Sprache
- Fachbegriffe werden korrekt verwendet und erklärt
- Gutes Zeitmanagement (vorgegebene Zeit wird eingehalten)
- Fokus auf zentrale Punkte (ohne sich in Details zu verlieren)
- Offenheit für Fragen und Kritik am Ende der Präsentation
- Fähigkeit, auf Rückfragen einzugehen und diese verständlich zu beantworten

Ggf. zusätzlich:

- Einbeziehung der Zuhörenden durch Fragen oder kurze Diskussionsrunden
- Kreative Methoden wie beispielsweise Quizze oder Umfragen

Fachspezifisch: Biologie

Mein Fach ist Biologie. Präsentationen kommen ab und zu vor. In Biologie ist es besonders wichtig, wissenschaftliche Zusammenhänge richtig darzustellen. Dazu gehört, dass man Fachbegriffe richtig verwendet und Prozesse und Zusammenhänge mithilfe von Beispielen, Diagrammen oder Modellen erklärt.

## Aufgaben nach dem Lesen

1. *Nachfolgend finden Sie eine Checkliste, die als Grundlage für das Üben von Präsentationen dienen kann. Welche Aspekte wären auch für Präsentationen in Ihrem eigenen Unterricht geeignet? Gibt es darüber hinaus Aspekte, die angepasst oder ergänzt werden müssten, damit es für Sie bzw. Ihre Fächer passt?*

Für diese Aufgabe gibt es zahlreiche Lösungen. Idealerweise können Sie sich über diese mit Kommiliton\*innen und/oder Kolleg\*innen austauschen, ggf. auch im Rahmen von universitären Seminarsitzungen. Nachfolgend finden Sie eine auf das Fach Biologie bezogene Lösung zur Illustration.

| Präsentation üben <i>Tipp</i>                                                                                     | Relevanz eigenes Fach                                                                                                                                                                        |
|-------------------------------------------------------------------------------------------------------------------|----------------------------------------------------------------------------------------------------------------------------------------------------------------------------------------------|
| Stell die Präsentation fertig zusammen, bevor du mit der Planung der technischen Seite der Präsentation beginnst. | Auch in der Biologie ist es wichtig, dass der Inhalt vollständig und korrekt ist, bevor technische Aspekte berücksichtigt werden, da die wissenschaftliche Genauigkeit im Vordergrund steht. |

|                                                                                                                                                                                                                                                                   |                                                                                                                                                                                                                                                                                                                                                                                                                                                               |
|-------------------------------------------------------------------------------------------------------------------------------------------------------------------------------------------------------------------------------------------------------------------|---------------------------------------------------------------------------------------------------------------------------------------------------------------------------------------------------------------------------------------------------------------------------------------------------------------------------------------------------------------------------------------------------------------------------------------------------------------|
| Überleg, welche Teile der Präsentation mit dem Zeigen von Folien leichter verständlich werden.                                                                                                                                                                    | In der Biologie spielen ggf. für die Präsentation Diagramme, Mikroskopbilder u.a. Darstellungsformen eine große Rolle – diese müssen i.d.R. im Rahmen der Präsentation erklärt werden, da sie nicht selbsterklärend sind. Gleichzeitig können sie Inhalte anschaulicher und verdichtet darstellen. Ggf. können neben Folien auch Realien (Gegenstände) und Modelle (z.B. Modell des Herzens) die Präsentation unterstützen und Folien ersetzen oder ergänzen. |
| Druck die Folien aus und mach Stichwortnotizen oder bereite A5-Kärtchen mit Stichworten zum Inhalt der Präsentation oder zu den Folien vor. Die Kärtchen können dir als Gedankenstütze dienen. Notier keine ganzen Sätze, die verleiten dich zum Auswendiglernen. | Für die Biologie ist es wichtig sich präzise, auszudrücken, um das Verständnis von zum Teil komplexen Themen bei den Zuhörenden zu erleichtern. Dabei soll nicht der Eindruck entstehen, dass die Präsentation auswendig gelernt worden ist.                                                                                                                                                                                                                  |
| Übe die Präsentation mehrmals. Zuerst am besten für dich allein. Achte dabei auf die Zeit. Arbeite dann mit jemand anderem zusammen. Präsentiert euch gegenseitig eure Präsentationen und gebt einander Rückmeldungen.                                            | Das Üben der Präsentation ist wichtig, um sicherzustellen, dass komplexe Inhalte korrekt erläutert werden, um keine falschen Informationen zu vermitteln oder Fehlvorstellungen zu erzeugen. Darüber hinaus kann die korrekte Aussprache biologische Begriffe (z.B. <i>Fibrinogen</i> ) eine Herausforderung darstellen und muss ggf. gesondert geübt werden.                                                                                                 |
| Wechsle die Folien nicht zu schnell. Lass die Bilder, Grafiken und Texte auf der Folie wirken. Lass dem Publikum Zeit, das, was dargestellt ist, auch zu verstehen. Du kannst auch Zeit für das Notizenmachen geben.                                              | Da im Fach Biologie häufig komplexe Aspekte präsentiert werden, sollten die Zuhörenden ausreichend Zeit erhalten, um komplexe Inhalte wie z.B. Stoffwechselwege oder DNA-Sequenzen zu erfassen und zu verstehen. Wie bereits angemerkt, sollte insbesondere für die Erläuterung von diskontinuierlichen Darstellungsformen ausreichend Zeit eingeplant werden.                                                                                                |
| Kontrollier einige Tage im Voraus, ob die Technik funktioniert: Kann der Computer den Stick lesen, funktioniert die Verbindung zum Beamer, funktioniert (falls nötig) die Tonübertragung, können Videosequenzen aus dem Netz wirklich eingespielt werden...?      | Biologie-Präsentationen (gerade in der Oberstufe) können häufig multimediale Inhalte wie Animationen von Prozessen oder Videos von Experimenten beinhalten, die die Thematik leichter verständlich machen sollen. Technische Probleme in Bezug auf solche multimedialen Inhalte könnten die Verständlichkeit beeinträchtigen.                                                                                                                                 |

|                                  |                                                                                                                                                                                                                                                                                                                                                          |
|----------------------------------|----------------------------------------------------------------------------------------------------------------------------------------------------------------------------------------------------------------------------------------------------------------------------------------------------------------------------------------------------------|
| Weitere Aspekte bzw. Anpassungen | <ul style="list-style-type: none"> <li>• Verständlichkeit von Fachbegriffen sicherstellen</li> <li>• Fachliche Genauigkeit überprüfen</li> <li>• Üben von Fragen und Diskussionen, die im Anschluss an der Präsentation auftreten können</li> <li>• Kleine Zusammenfassungen erstellen, so dass die Thematik selbst umfassend verstanden wird</li> </ul> |
|----------------------------------|----------------------------------------------------------------------------------------------------------------------------------------------------------------------------------------------------------------------------------------------------------------------------------------------------------------------------------------------------------|

2. Lesen Sie den nachfolgenden Auszug und bestimmen Sie Merkmale gesprochener Sprache.

|   |                                                                                                                    |
|---|--------------------------------------------------------------------------------------------------------------------|
| 1 | h° ÄHM wir haben (.) die blätter als DACH genommen; weil                                                           |
| 2 | sie halt GLATT sind, (-) und da halt das Wasser RUNterläuft;                                                       |
| 3 | u:nd nicht ins HAUS eindringt, (.) u:nd dann haben wir halt                                                        |
| 4 | (.) dieses geflecht HIER, ((zeigt an Modell)) (.) an den                                                           |
| 5 | SEIten; weil das halt; (.) wenns windig ist (.) sich so                                                            |
| 6 | MITschwingt, weil das halt DEHNbar ist; (.) un:d trotzdem                                                          |
| 7 | STAbil, (-) U:ND wie thomas halt auch schon gesagt hat (.)<br>die wurzeln damit das halt nicht RUTschig ist. (---) |

- Betonungen auf wichtigen Inhalten (z.B. *GLATT* in Z.1 als wichtigster Teil der Begründung)
- Deiktische Verweise (*dieses geflecht* in Z. 3, begleitet von Zeigegeste)
- Pausen (z.B. (.) in Z. 1 und Z.3, längere Pause in Z. 7 (---) als Hinweis auf Ende der Äußerung; Sprecher\*in hat Redebeitrag beendet)
- Längungen (*U:ND* in Z. 6, in Kombination mit Pause davor und Betonung könnte das auf Nachdenken hinweisen bzw. dass der\*die Sprecher\*in das Rederecht noch nicht abgeben möchte)
- Abbrüche oder Reformulierungen finden sich im Beispiel nicht
- Es finden sich zahlreiche Nachsätze (Rechtsherausstellungen), z.B. *weil das halt DEHNbar ist; (.) un:d trotzdem STAbil*, in Z.5f.)- der Nebensatz *weil das halt DEHNbar ist*; endet mit leicht fallender Intonation – er wäre sowohl grammatikalisch als auch von der Intonation her als vollständig und dementsprechend beendet bzw. fertig einzuschätzen, daher wäre *un:d trotzdem STAbil*, als Nachtrag einzuordnen
- Weitere Lösungen (und Beispiele für Merkmale gesprochener Sprache) sind möglich.

3. Lesen Sie die nachfolgenden Beispiele. Einmal handelt es sich um geschriebene Texte von Schüler\*innen (Beobachtungsprotokoll aus dem Biologieunterricht) und einmal um Ausschnitte aus der Unterrichtsinteraktion (Biologieunterricht). Diskutieren Sie, ob die Wort-/ Gliedstellung in den markierten Sätzen richtig oder falsch ist. Hat die Syntax in dem Fall eine fachliche Relevanz?

Ganz grundlegend ist festzuhalten, dass der Konnektor *weil* Nebensätze einleitet, in denen das finite Verb in Endstellung steht. Dies gilt für das Schriftsprachliche. In der gesprochenen Sprache sind *weil*-Sätze mit Verbzweitstellung bereits seit Längerem keine Ausnahme und werden nicht als fehlerhaft angesehen. Dies kann sich – insbesondere bei unerfahrenen Schreiber\*innen auch auf das Schriftliche auswirken. Es ist nicht ausgeschlossen, dass sich der sprachliche Usus in den kommenden Jahren bzw. Jahrzehnten weiter verändern wird, sodass



Maak, Diana/ Petersen, Inger (2025): Sprachbildung in allen Schulfächern der Sekundarstufe. Grundlagen, Konzepte und Methoden der germanistischen Linguistik und Sprachdidaktik. De Gruyter.

*weil*-Sätze mit Verbzweitstellung auch schriftsprachlich nicht mehr als problematisch oder fehlerhaft angesehen werden. I.d.R. hat die Verbstellung keinerlei Auswirkungen auf den Inhalt bzw. die fachliche Korrektheit und Verständlichkeit.

*Beispiel 1: „Weil bei dem ersten Versuch ist die normale Luft schon drin [...]“*

Der Satz beginnt in diesem Beispiel mit dem Konnektor *weil*, der normalerweise einen Nebensatz einleitet. Hier steht er aber als Einleitung des Hauptsatzes, so dass dies grammatikalisch nicht korrekt ist. Eine korrekte Formulierung wäre: *Beim ersten Versuch ist normale Luft im Glas, aber beim zweiten Versuch pustet die Frau mit einem Schlauch ausgeatmete Luft hinein, wodurch die Kerze schneller ausgegangen ist*. Die Verbzweitstellung hat keine Auswirkungen auf die fachliche Korrektheit. Aber vermutlich wäre ein alternativer Konnektor (z.B. *denn*) dennoch passender.

*Beispiel 2: „[...] weil eine Flamme braucht Sauerstoff zum Bbrennen.“*

Der Satz *weil eine Flamme braucht Sauerstoff zum Bbrennen* ist grammatikalisch nicht korrekt, da das finite Verb in einem Nebensatz im Deutschen am Ende steht. Korrekt wäre: *weil eine Flamme Sauerstoff zum Brennen braucht*. Dennoch führt dieser Fehler nicht zur Beeinträchtigung des fachlichen Verständnisses.

*Beispiel 3: „[...] weil wir müssen ja erst wissen, [...].“*

Da es sich um gesprochene Sprache handelt, ist die Verwendung der Verbzweitstellung nicht als fehlerhaft einzuordnen (alternativ *weil wir ja erst wissen müssen, wo wir es hinsortieren*.) Die Verbzweitstellung hat in diesem Kontext keine fachliche Relevanz. Der Inhalt bleibt verständlich. Interessant ist, dass es sich hier um eine Äußerung der Lehrperson handelt, was noch einmal zeigt, dass die Verwendung der Verbzweitstellung in *weil*-Sätzen in der gesprochenen Sprache weit verbreitet ist.

*Beispiel 4: „weil da steht DEN blut.“*

S03 korrigiert S07, der gerade an die Tafel schreibt; nach einer ersten Korrektur, auf die S07 mit einer Rückfrage (*was*) reagiert, erfolgt eine Wiederholung der korrekten Variante (*DAS blut*) und eine erweiterte Begründung für die Korrektur (*weil da steht DEN Blut*). Auch in diesem Fall wird in der gesprochenen Sprache ein *weil*-Satz mit Verbzweitstellung verwendet; hier ließe sich argumentieren, dass so die Intention noch deutlicher wird als wenn der *weil*-Satz mit Verbendstellung produziert worden wäre – *weil* indiziert, dass eine Erklärung folgt, *da steht* ermöglicht eine Orientierung im Raum (deiktischer Verweis, es geht um das Angeschriebene) und der der wichtigste Aspekt, das zu Korrigierende (*DEN blut*), wird betont und steht am Ende der Äußerung.

## 13. Lesen in allen Unterrichtsfächern

### Aufgaben vor dem Lesen

1. Bitte lesen Sie den nachfolgenden Text. Welche der folgenden Fragen können Sie (ohne weitere Unterstützung wie z.B. Übersetzungshilfen) beantworten?

a) Worum geht es im Text?

☐ Basketball ☒ Fußball ☐ Handball

Hinweis: Bild von Fußballer (İlkay Gündoğan, Deutscher Fußballspieler) im 2024 eingeführten neuen Trikot der Nationalmannschaft. Aufgrund des verschwommenen Hintergrunds gibt es jedoch wenige Hinweise auf dem Foto – kann man weder den konkreten Spieler noch das Trikot erkennen, dann wird die Antwort auf die Frage vermutlich schwerfallen.

b) Wird im Text von einem bestimmten Spiel berichtet?

☐ ja ☒ nein

Hinweis: Im Textauszug sind keine Hinweise auf Ergebnisse zu finden (Zahl 2024 zeigt, dass auch Fußballergebnisse lesbar wären, z.B. 2:1). Außerdem ist auf dem Foto lediglich ein Spieler zu sehen – häufig (nicht immer) werden bei Spielen Szenen aus dem Spiel, bei denen mehrere Spieler\*innen in Aktion zu sehen sind, verwendet.

c) Geben Sie in ein bis zwei Sätzen eine kurze Zusammenfassung des Inhalts.

Es handelt sich um ein Spielerporträt von İlkay Gündoğan, der zur Europameisterschaft 2024 als Kapitän der Nationalmannschaft auflief. Hauptsächlich wird sein Werdegang und er als exzellenter Fußballer dargestellt, z.B. indem seine Erfolge als Fußballspieler aufgelistet werden.

Für Interessierte hier die Übersetzung zum Text (basierend auf einer deepl-Übersetzung, kostenlose Version, Stand 13.08.2024):

**İlkay Gündoğan, Kapitän der deutschen Fußballnationalmannschaft**

**Der perfekte Teamplayer, um die deutsche Nationalmannschaft bei der Euro 2024 auf und neben dem Platz zu führen**

Bildunterschrift: Kapitän İlkay Gündoğan im Trikot der deutschen Nationalmannschaft

Er ist der rätselhafteste Superstar des Weltfußballs: İlkay Gündoğan, Kapitän der deutschen Fußball-Nationalmannschaft. "Er ist zu allem fähig", sagt Star-Trainer Pep Guardiola von Manchester City, Englands Meister. Gündoğan ist in Gelsenkirchen im Ruhrgebiet geboren und aufgewachsen. Er spielte in Nürnberg in Bayern, wo er auch sein Abitur machte, gewann dann mit Dortmund die Bundesliga, spielte für Manchester City und spielt jetzt für Barcelona in Spanien. Aber die Liste der Erfolge geht weiter: Deutscher Meister, fünfmal englischer Meister, Meister mit City.

Maak, Diana/ Petersen, Inger (2025): Sprachbildung in allen Schulfächern der Sekundarstufe. Grundlagen, Konzepte und Methoden der germanistischen Linguistik und Sprachdidaktik. De Gruyter.

2. *Bitte überlegen Sie: Welche Textsorten sind typisch für Ihre Unterrichtsfächer? Welche Texte werden gelesen und geschrieben? Welche Herausforderungen beinhalten diese?*

Für diese Aufgabe sind zahlreiche Lösungen möglich. Nachfolgend wird lediglich für das Fach Biologie ein Beispiel gegeben. Vergleichen Sie Lösungen für andere Fächer gerne mit Kommiliton\*innen und/oder Kolleg\*innen.

Fach Biologie:

Lesen: Lehrbuchtexte vor allem mit Darstellungstexten, Fachartikel, Versuchsanleitungen, Tabellen, Grafiken, Diagramme

Schreiben: Protokolle (z.B. Versuchsbeobachtung, -beschreibung, -erklärung)

Beispiele für Herausforderungen beim Lesen einer Versuchsanleitung:

- (Bildungs-)sprachliche Mittel, z.B.
  - Präfix-/Partikelverben (umstülpen, eingießen, aufheizen)
  - Imperativ (*Füllt/Fülle das Becherglas bis zum Rand mit Wasser auf.*)
  - Präpositionen (*Stecke das Thermometer in die warme Flüssigkeit.*)
  - Temporale Adverbien (*zunächst, nun, dann*)
- Verknüpfung Text-Bild-Relationen
- Strategisches Vorgehen beim Lesen einer Versuchsanleitung (z.B. Schritt-für-Schritt)
- Verstehen von Handlungsaufforderungen (Können die Schüler\*innen die Handlungsaufforderungen verstehen, für welche sie in der Versuchsanleitung aufgefordert werden?)
- ...

Beispiele für Herausforderungen beim Schreiben eines Versuchsprotokoll:

- Typischer Aufbau der Textsorte Versuchsprotokoll (Fragestellung, Materialliste, Durchführungsbeschreibung, Beobachtung, Auswertung)
- Einsatz textsortengerechten Wortschatzes und entsprechend passender Formulierungen (z.B. bei der Durchführungsbeschreibung Temporaladverbien *zuerst, dann*) sowie Verwendung von finalen und konditionalen Satzgefügen zur Darstellung der Beobachtung (z.B. konditional *wenn-dann*-Satzgefüge)
- Ausführung der geforderten sprachlichen Handlung (z.B. beim Verfassen der Beobachtung: Es wird nur beschrieben was beobachtet wird, dabei erfolgt noch keine Auswertung)
- Beobachtung wird im Präsens und unpersönlich (mit der man-Form oder im Passiv) geschrieben
- ...

## Aufgaben nach dem Lesen

1. *Aus Perspektive der Lesedidaktik ist die Aufgabe Unterstreiche alle wichtigen Informationen im Text eher nicht gelungen. Was denken Sie (basierend auf der Lektüre dieses Kapitels), wie dies begründet wird? Und welche möglichen Anpassungen dieser Aufgabe können zur Verbesserung vorgenommen werden bzw. welche Alternativvorschläge können Sie machen?*

Aus der Perspektive der Lesedidaktik ist die Aufgabe „Unterstreiche die wichtigsten Informationen“ kritisch zu betrachten. Bei informationsdichten Texten besteht die Gefahr, dass die Schüler\*innen ggf. den ganzen Text markieren. Die Herangehensweise könnte auch dazu führen, dass Schüler\*innen isolierte Informationen markieren, ohne Zusammenhänge, die aus dem Text hervorgehen, zu verstehen. Durch das Markieren der vermeintlich wichtigsten Informationen birgt die Gefahr, dass der Text nicht als Ganzes verstanden wird. Gleichzeitig ist die Antwort auf die Frage abhängig davon, mit welcher Leseintention der Text gelesen wird. So kann es sein, dass lediglich ein Aspekt (z.B. Ursachen für...) von Bedeutung ist. Die Formulierung suggeriert, dass es objektiv gesehen wichtige und unwichtige Informationen gibt. Das ist aber nicht so.

Alternativ sollte den Schüler\*innen Hilfestellungen zur Strukturierung des Leseprozesses und für die Fokussierung ihrer Lesearbeit bereitgestellt werden. Möglichkeiten hierfür sind z.B. die Nennung der zentralen Konzepte oder Begriffe, die verstanden werden sollen, die Formulierung eines Leseziels, das (eigenständige) Fragen stellen an den zu lesenden Text.

2. *Projekt: Nehmen Sie ein Lehrwerk aus Ihrem Unterrichtsfach in die Hand und sehen Sie sich eine Doppelseite genauer an. Beurteilen Sie den Lesetext hinsichtlich unterschiedlicher Aspekte: a) sprachliche Komplexität, b) Textdesign, c) ggf. Bild-Textbezüge, d) Angemessenheit der Aufgaben. Machen Sie ggf. Verbesserungsvorschläge.*

Für diese Aufgabe gibt es zahlreiche individuelle Lösungen. Idealerweise können Sie sich über diese mit Kommiliton\*innen und/oder Kolleg\*innen austauschen, ggf. auch im Rahmen von universitären Seminarsitzungen. Bitte beachten Sie auch die Ausführungen im Kapitel zu Funktionen und Herausforderungen von Sprache im Kontext der Wissensvermittlung. In diesem werden vor allem Hinweise für a) gegeben.

## 14. Bildliche Darstellungen im Fachunterricht

### Aufgaben vor dem Lesen

1. *In den Abb. 14.1 bis 14.6 sehen Sie verschiedene bildliche Darstellungen – welche Gemeinsamkeiten und Unterschiede weisen sie auf? Hinweis: Für die Bearbeitung dieser Aufgabe ist es nicht notwendig, den Text in den bildlichen Darstellungen im Detail lesen zu können.*

Für diese Aufgabe gibt es verschiedene Lösungen. Idealerweise können Sie sich über diese mit Kommiliton\*innen und/oder Kolleg\*innen austauschen, ggf. auch im Rahmen von universitären Seminarsitzungen. Nachfolgend finden Sie ein Beispiel.

Die bildlichen Darstellungen unterscheiden sich in Art, Abstraktionsgrad und Funktion. So finden sich Fotografien, Diagramme, Karten, Karikaturen sowie schematische Zeichnungen. Gemeinsam ist ihnen, dass sie Informationen verdichten und visuell zugänglich machen, die sprachlich nur schwer darstellbar wären. Unterschiede bestehen insbesondere im Grad der Realitätsnähe und Symbolisierung: Fotografien zeigen reale Ausschnitte der Wirklichkeit, während Diagramme und Karten abstraktere, symbolische Darstellungen sind.

Im Fachunterricht übernehmen bildliche Darstellungen verschiedene Funktionen. Sie können Wissen veranschaulichen, indem sie beispielsweise den Aufbau einer Pflanzenzelle sichtbar machen, oder Lernprozesse unterstützen, etwa durch Diagramme, die Abläufe Schritt für Schritt darstellen. Ebenso können sie zur Motivation der Lernenden beitragen, wenn etwa ansprechende Naturfotografien Interesse wecken, oder zur Bewertung und kritischen Auseinandersetzung anregen, wie dies etwa bei der Analyse historischer Karikaturen im Fach Geschichte der Fall ist.

2. *Sehen Sie sich nun das Foto aus Aufgabe 1 (Abb. 14.4) genauer an. Wer und was ist abgebildet? Welches Wissen haben Sie zum Thema? Machen Sie sich gerne Notizen.*

Für diese Aufgabe gibt es zahlreiche individuelle Lösungen und kein Richtig oder Falsch. Im Austausch mit Kommiliton\*innen und/oder Kolleg\*innen wird aber ggf. deutlich, dass hier sehr unterschiedliche Wissensbestände bestehen. Gerne können Sie auch Außenstehende, z.B. Freund\*innen zu deren Vorwissen befragen und mit Ihrem vergleichen. Im Rahmen des Kapitels wird noch näher auf das Foto eingegangen, sodass hier keine inhaltlichen Angaben gemacht werden.

3. *Vergleichen Sie nun die folgenden drei Bildunterschriften bzw. Bildlegenden zu Abb. 14.4. Was können Sie aus dem Vergleich über die Bildunterschriften für das Lesen bzw. das Verständnis von Bildern ableiten?*

„In der Presse, im Schulbuch und im Museum werden Bilder stets mit „Legenden“ versehen. Das sind mehr oder minder ausführliche Textzeilen unter (auch neben oder über) den Bildern. Bildlegenden schränken die Autonomie des Bildes ein. Sie reduzieren Vieldeutigkeiten und

Maak, Diana/ Petersen, Inger (2025): Sprachbildung in allen Schulfächern der Sekundarstufe. Grundlagen, Konzepte und Methoden der germanistischen Linguistik und Sprachdidaktik. De Gruyter.

Bedeutungsdifferenzen. Sie können dem Betrachter aber auch eine bestimmte Deutung aufzwingen, in dem sie seine Wahrnehmung steuern, festlegen und manipulieren“ (Pandel 2015: 145). Die drei Bildunterschriften unterscheiden sich in Informationsgehalt, sprachlicher Gestaltung und Kontextualisierung.

- a) benennt knapp Handlung und Ort,
- b) liefert zusätzliche Angaben zu Quelle und Jahr,
- c) stellt darüber hinaus einen gesellschaftlichen Zusammenhang her und interpretiert die Szene.

Daraus lässt sich ableiten, dass Bildunterschriften sowohl die Lesart als auch die Interpretation eines Bildes wesentlich steuern und zusätzliche Informationen bereitstellen, die visuell nicht erkennbar sind. Je nach Formulierung können sie beschreibend oder interpretierend wirken. Vergleicht man die Informationen, die im Kapitel zu den so genannten Trümmerfrauen (vgl. Exkurs) gegeben werden, dann ist Bildunterschrift c) als Deutung (besondere Bedeutung Frauen, Trümmerfrauen) einzuordnen, die nicht ausschließlich denotativ (Benennung des Anschauungsgegenstands u.a.) oder technisch (Angaben zu Urheberschaft u.a.), sondern signifikativ als eine Form manipulierender Texte sind (Pandel 2015: 150–155). Im Unterricht sollte daher gezielt darauf hingewiesen werden, welche sprachlichen Mittel sich für präzise und funktional passende Bildunterschriften eignen, und eine eingehende Beschäftigung mit Bildlegenden und -unterschriften stattfinden.

## Aufgaben nach dem Lesen

1. Wählen Sie eine Schulbuchdoppelseite aus (alternativ andere Arbeitsmaterialien, die bildliche Darstellungen und kontinuierlichen Text enthalten) und analysieren Sie diese fokussiert auf die bildlichen Darstellungen und deren Bezug zum kontinuierlichen Text.

Für diese Aufgabe gibt es zahlreiche individuelle Lösungen. Idealerweise können Sie sich über diese mit Kommiliton\*innen und/oder Kolleg\*innen austauschen, ggf. auch im Rahmen von universitären Seminarsitzungen.

2. Nachfolgend finden Sie Hinweise zum Erwartungshorizont für die Beschreibung eines Klimadiagramms, ein Klimadiagramm (in Anlehnung an Berger et al. 2002: 38) sowie einen dazugehörigen Text.
  - a) Analysieren Sie die Beschreibung: Was ist im Text bereits gut gelungen und welche Informationen fehlen der Beschreibung?

Die Beschreibung nennt Temperatur- und Niederschlagswerte und verweist auf Jahreszeiten. Positiv hervorzuheben ist die Verwendung fachlich korrekter Begriffe, etwa *Temperaturmaximum*, *Niederschlagsmenge* oder *Trockenzeit*. Auch die Gliederung folgt der typischen Struktur einer Diagrammbeschreibung (Einleitung – Hauptteil – Schluss). Es fehlen jedoch eine genauere Interpretation der Daten, insbesondere die Verknüpfung zwischen Temperatur- und Niederschlagsverlauf, sowie sprachliche Mittel, die Zusammenhänge

Maak, Diana/ Petersen, Inger (2025): Sprachbildung in allen Schulfächern der Sekundarstufe. Grundlagen, Konzepte und Methoden der germanistischen Linguistik und Sprachdidaktik. De Gruyter.

verdeutlichen (z. B. „während“, „deshalb“, „im Gegensatz zu“). Die Beschreibung bleibt damit weitgehend deskriptiv, ohne kausale oder vergleichende Relationen herzustellen.

*b) Wie könnten Sie den Lernenden bei der erfolgreichen Beschreibung des Diagramms unterstützen?*

Für diese Aufgabe gibt es verschiedene individuelle Lösungen. Nachfolgend finden Sie ein Beispiel.

Lehrkräfte können den Erwerb sprachlicher Kompetenzen durch gezielte Hilfestellungen unterstützen. Zunächst ist es wichtig und mit Blick auf Klimadiagramme auch gängig, die Funktion und den schematischen Aufbau dieser Textsorte kennenzulernen. Auch die Beschreibung von Klimadiagrammen ist ‚starr‘ und damit gut vermittel- und trainierbar. Dies kann durch die Arbeit mit Satzbauplänen oder Hilfskarten mit Redemitteln zu Operatoren wie *Beschreiben*, *Vergleichen* und *Interpretieren* erfolgen. Auch das gemeinsame Erarbeiten von Struktur, typischen Satzanfängen bzw. Formulierungen und relevanten sprachlichen Strukturen auf Basis von Modelltexten hilft Lernenden, eigene Texte zu Klimadiagrammen zu verfassen. Auf diese Weise wird das Bewusstsein für die sprachliche Gestaltung fachlicher Darstellungen geschärft und das Verständnis von Text-Bild-Bezügen gefördert.

Im konkreten Fall könnte dem Lernenden rückgemeldet werden, dass er bereits über ein gutes inhaltliches Grundverständnis verfügt, aber noch stärker auf Zusammenhänge eingehen sollte („Wenn die Temperatur steigt, sinkt die Niederschlagsmenge ...“). Ein solches Feedback macht sprachliche Entwicklungsziele transparent und unterstützt gezielt die Weiterentwicklung der fach- und bildungssprachlichen Kompetenz.

## 15. Schreiben in allen Unterrichtsfächern

### Aufgaben vor dem Lesen

1. *Sicherlich mussten Sie im Laufe Ihres Studiums schon einmal einen längeren wissenschaftlichen Text (z.B. eine Hausarbeit) schreiben. Bitte überlegen Sie:*
  - a) Bei dieser Aufgabe gibt es lediglich individuelle Lösungen. Da es um Ihre persönliche Haltung geht, gibt es auch kein Richtig oder Falsch. Vielleicht schreiben Sie gerne Hausarbeiten, weil Sie ein interessantes (selbst gewähltes) Thema eigenständig erarbeiten und vertiefend verstehen können. Vielleicht erleben Sie das epistemische Schreiben (Schreiben als Mittel zum Denken und zur Erweiterung des eigenen Horizonts) als gewinnbringend. Auch das Produkt (einen komplexen, umfangreichen Text geschrieben zu haben) kann etwas sein, worauf man stolz ist. Vielleicht empfinden Sie das Schreiben von Hausarbeiten aber auch als wenig motivierend, z.B. weil sie lediglich von einer Person gelesen werden und Ihnen das wissenschaftliche Recherchieren und Schreiben schwerfällt, Sie außerdem das Gefühl haben, dass es genügend gute Texte zum Thema gibt.
  - b) Für diese Aufgabe gibt es zahlreiche individuelle Lösungen. Idealerweise können Sie sich über diese mit Kommiliton\*innen und/oder Kolleg\*innen austauschen, ggf. auch im Rahmen von universitären Seminarsitzungen.
  - c) Für diese Aufgabe gibt es zahlreiche individuelle Lösungen. Idealerweise können Sie sich über diese mit Kommiliton\*innen und/oder Kolleg\*innen austauschen, ggf. auch im Rahmen von universitären Seminarsitzungen. Wichtig ist, dass eigene Schreiberfahrungen in der Schule sich häufig darauf auswirken, welche Rolle Sie als Lehrer\*in dem Schreiben in Ihrem eigenen Unterricht beimessen. Idealerweise reflektieren Sie dies während der Lektüre des Kapitels und überlegen.



## Aufgaben nach dem Lesen

1. *Bitte reflektieren Sie eine Stunde, die Sie selbst gehalten haben oder die Sie beobachtet haben, in der Schüler\*innen einen Text schreiben sollten. Inwiefern lassen sich die drei Phasen des Schreibprozesses in diesem wiederfinden?*

Für diese Aufgabe gibt es zahlreiche individuelle Lösungen. Idealerweise können Sie sich über diese mit Kommiliton\*innen und/oder Kolleg\*innen austauschen, ggf. auch im Rahmen von universitären Seminarsitzungen. Nachfolgend finden Sie ein Beispiel.

Beispiel: Deutsch Unterricht Klasse 9 – Verfassen einer Gedichtanalyse

In einer gehaltenen Unterrichtseinheit in Deutsch, die zum Ziel hatte, eine Gedichtanalyse zu verfassen, wurde zunächst in einer Stunde ein Planungsraster eingeführt, welches Kriterien zum Aufbau einer Gedichtinterpretation umfasst. Dieses Raster stellt die Grundlage dafür dar, dass im Text zentrale Aspekte der Analyse berücksichtigt werden. Somit stand in dieser Stunde das Planen eines Textes im Vordergrund. In einem weiteren Schritt haben die Schüler\*innen die Aufgabe erhalten, aufbauend auf dem Planungsraster und verschiedenen Formulierungshilfen einen Text zu verfassen. Darauf folgte eine Stunde, die der Überarbeitung diente. Im Rahmen einer Schreibkonferenz tauschten die Lernenden ihre Texte aus und untersuchten diese anhand zentraler Aspekte (sowohl inhaltlich als auch orthographisch). Die Schüler\*innen erhielten anschließend ihre Gedichtanalysen zurück und überarbeiteten diese. Dieser Prozess, der die drei Phasen des Schreibprozesses beinhaltet, umfasste deutlich mehr Zeit als eine Schulstunde. Auf Grundlage dieses Prozesses entstanden überwiegend gute Texte, die durch eine ausgiebige Planung die meisten Aspekte einer Gedichtanalyse ausformuliert umfassten.

2. *Bitte wählen Sie aus einem Schulbuch eine Aufgabe aus, die einen typischen Operator aus einem Ihrer Fächer enthält. Entwickeln Sie auf Basis der Fragen oben (Tabelle 1) eine optimierte Schreibaufgabe.*

Schreibaufgabe Biologie: Beschreibe den Versuchsaufbau aus dem dargestellten Experiment.

Optimierte Schreibaufgabe: Beschreibe den Versuchsaufbau des Experiments zur Untersuchung der Photosynthese. Eine Person, die das Experiment nicht selbst durchgeführt hat, soll es anhand deiner Beschreibung nachstellen können.

Gehe wie folgt vor:

- 1.) Plane deinen Text. Er soll Antworten auf folgende Fragen geben: Welche Schritte sind notwendig, um den Versuch aufzubauen? Welches Material wird wann wozu benötigt?
- 2.) Überprüfe, ob du in deiner Planung das passende Fachvokabular verwendet hast (siehe Kasten zum Fachvokabular).
- 3.) Schreibe nun deinen Text. Lies ihn dir abschließend noch einmal durch und überprüfe, ob der Text alle relevanten Informationen beinhaltet.
- 4.) Tausche deinen Text mit eine\*m Mitschüler\*in aus. Lies den Text deines\*deiner Mitschülers\*in und überlege, ob du das Experiment anhand der Beschreibung nachstellen könntest. Was ist gelungen am Text, was könnte noch verbessert werden?

Maak, Diana/ Petersen, Inger (2025): Sprachbildung in allen Schulfächern der Sekundarstufe. Grundlagen, Konzepte und Methoden der germanistischen Linguistik und Sprachdidaktik. De Gruyter.

5.) Gebt euch gegenseitig Feedback und überarbeitet eure Texte bei Bedarf.

3. *Erstellen Sie auf Grundlage des Beispiels im Kapitel einen Schreibrahmen für ein typisches Textgenre aus Ihrem Fach.*

Für diese Aufgabe gibt es zahlreiche individuelle Lösungen. Idealerweise können Sie sich über diese mit Kommiliton\*innen und/oder Kolleg\*innen austauschen, ggf. auch im Rahmen von universitären Seminarsitzungen. Nachfolgend finden Sie Beispiel für eine fachspezifische Lösung im Fach Deutsch – ein Planungsraster für eine Gedichtanalyse (angepasst an 9. Klasse einer Gemeinschaftsschule).

Maak, Diana/ Petersen, Inger (2025): Sprachbildung in allen Schulfächern der Sekundarstufe. Grundlagen, Konzepte und Methoden der germanistischen Linguistik und Sprachdidaktik. De Gruyter.

| Struktur                                                                                                                                                                                                                                                                                    |                                                                                                                                        | Gedichtanalyse                                                                                                                                                                                                              |                                                                                                                                                                                                                                                                                                                                                                            |
|---------------------------------------------------------------------------------------------------------------------------------------------------------------------------------------------------------------------------------------------------------------------------------------------|----------------------------------------------------------------------------------------------------------------------------------------|-----------------------------------------------------------------------------------------------------------------------------------------------------------------------------------------------------------------------------|----------------------------------------------------------------------------------------------------------------------------------------------------------------------------------------------------------------------------------------------------------------------------------------------------------------------------------------------------------------------------|
|                                                                                                                                                                                                                                                                                             | Beispiel Notizen „Die Stadt“ (Theodor Storm)                                                                                           | Beispiele – ausformuliert „Die Stadt“ (Theodor Storm)                                                                                                                                                                       | Sprachhilfen                                                                                                                                                                                                                                                                                                                                                               |
| Einleitung                                                                                                                                                                                                                                                                                  |                                                                                                                                        |                                                                                                                                                                                                                             |                                                                                                                                                                                                                                                                                                                                                                            |
| <b>Zentrale Daten</b> <ul style="list-style-type: none"><li>• Autor*in</li><li>• Titel des Gedichts</li><li>• Erscheinungsjahr</li></ul>                                                                                                                                                    | <ul style="list-style-type: none"><li>• Theodor Storm</li><li>• Die Stadt</li><li>• 1854</li></ul>                                     | <i>In dem lyrischen Text „Die Stadt“ von Theodor Storm aus dem Jahr 1854 beschreibt der Sprecher seine Heimatstadt Husum und seine Gefühle gegenüber dieser Stadt.</i>                                                      | <ul style="list-style-type: none"><li>• In dem lyrischen Text...von... aus dem Jahr...</li><li>• In (Autornamen)s lyrischen Text...aus dem Jahr...</li></ul> <p>Der Text...<br/>beschreibt * beschäftigt sich mit dem Thema *<br/>handelt von* thematisiert</p> <p>In dem Text...<br/>geht es um * wird...dargestellt *</p>                                                |
| <b>Thema</b> <ul style="list-style-type: none"><li>• Worum geht es in dem Gedicht?</li><li>• Wird eine Handlung, eine Situation/Szene beschrieben oder werden Gefühle, Eindrücke, Gedanken oder eine Stimmung dargestellt?</li></ul>                                                        | <ul style="list-style-type: none"><li>• Heimatstadt von Storm (Husum)</li><li>• Gefühle ihr gegenüber</li></ul>                        |                                                                                                                                                                                                                             |                                                                                                                                                                                                                                                                                                                                                                            |
| <b>Der lyrische Sprecher (ein Satz)</b> <ul style="list-style-type: none"><li>• Tritt ein lyrischer Sprecher (lyrisches Ich/Wir) in Erscheinung?</li><li>• Welche Haltung hat das lyrische Ich (z.B. begeistert, traurig, kritisch, anklagend)? / Wie fühlt sich das lyrisch Ich?</li></ul> | <ul style="list-style-type: none"><li>• Nachdenkliches lyrisches Ich</li><li>• lyrisches Ich: traurig? einsam? hoffnungslos?</li></ul> | <i>In dem lyrischen Text tritt ein lyrisches Ich in Erscheinung, das sich traurig und einsam fühlt. Das lyrische Ich fühlt sich unwohl und irgendwie gefangen, sowohl in der Stadt als auch in seinen eigenen Gefühlen.</i> | <ul style="list-style-type: none"><li>• In dem lyrischen Text tritt ein lyrisches Ich / Wir in Erscheinung, das...<br/>nachdenklich * ruhig * gefühlvoll * verträumt *<br/>distanziert * begeistert * traurig * kritisch *<br/>anklagend *</li><li>...wirkt.</li><li>• In dem lyrischen Text ist der lyrische Sprecher nicht direkt greifbar.</li></ul>                    |
| Hauptteil 1 – Formaler Aufbau                                                                                                                                                                                                                                                               |                                                                                                                                        |                                                                                                                                                                                                                             |                                                                                                                                                                                                                                                                                                                                                                            |
| <b>Strophen und Verse</b> <ul style="list-style-type: none"><li>• Wie viele Strophen hat das Gedicht?</li></ul> Sind sie alle gleich aufgebaut? Aus wie vielen Versen besteht eine Strophe?                                                                                                 | <ul style="list-style-type: none"><li>• 3 Strophen, jeweils 5 Verse</li></ul>                                                          | <i>Das Gedicht besteht aus drei Strophen mit jeweils fünf Versen.</i>                                                                                                                                                       | <ul style="list-style-type: none"><li>• Das Gedicht besteht aus / gliedert sich in...</li><li>• ...Strophen mit jeweils...Versen.<br/>...Strophen mit jeweils unterschiedlicher Anzahl an Versen. Die erste und zweite Strophe enthält...Verse. Die dritte Strophe wird durch...Verse gebildet.</li></ul>                                                                  |
| <b>Reimform</b><br>Ist das Gedicht gereimt? Welche Reimform liegt vor?                                                                                                                                                                                                                      | <ul style="list-style-type: none"><li>• Keine Reimform</li></ul>                                                                       | <i>Das Gedicht weist keine eindeutige Reimform auf. Die Fünfzeiler haben das Reimschema abaab, wodurch sie sich weder dem Kreuzreim noch dem umarmenden Reim eindeutig zuordnen lassen.</i>                                 | <ul style="list-style-type: none"><li>• Die Verse sind durch einen Paarreim (aabb) / Kreuzreim (abab) / umarmenden Reim (abba) gebunden.</li><li>• Das Gedicht weist keine Reime auf.</li><li>• Die ersten beiden Strophen sind in einem ein Paarreim/Kreuzreim/umarmenden Reim (aabb/abab/abba) verfasst. In der dritten und vierten Strophe variiert der Reim.</li></ul> |
| Hauptteil 2 – Inhaltsangabe                                                                                                                                                                                                                                                                 |                                                                                                                                        |                                                                                                                                                                                                                             |                                                                                                                                                                                                                                                                                                                                                                            |

|                                                                                                                                                                                                                                                                                                                |                                                                                                                                                                                                            |                                                                                                                                                                                                                                                                                                                                                                                                                                                                                                                                                                                                                                                                                                                                                                                                                                                                                                                                                                                                                                                                                                                                                                                                          |                                                                                                                                                                                                                                                                                                                                                                                                                                                                                                                                       |
|----------------------------------------------------------------------------------------------------------------------------------------------------------------------------------------------------------------------------------------------------------------------------------------------------------------|------------------------------------------------------------------------------------------------------------------------------------------------------------------------------------------------------------|----------------------------------------------------------------------------------------------------------------------------------------------------------------------------------------------------------------------------------------------------------------------------------------------------------------------------------------------------------------------------------------------------------------------------------------------------------------------------------------------------------------------------------------------------------------------------------------------------------------------------------------------------------------------------------------------------------------------------------------------------------------------------------------------------------------------------------------------------------------------------------------------------------------------------------------------------------------------------------------------------------------------------------------------------------------------------------------------------------------------------------------------------------------------------------------------------------|---------------------------------------------------------------------------------------------------------------------------------------------------------------------------------------------------------------------------------------------------------------------------------------------------------------------------------------------------------------------------------------------------------------------------------------------------------------------------------------------------------------------------------------|
| <p><i>Schreibe eine kurze Inhaltsangabe. Gehe strophenweise vor. Notiere dir hier erst Stichpunkte zu den einzelnen Strophen, bevor du ganze Sätze schreibst.</i></p>                                                                                                                                          | <ul style="list-style-type: none"> <li>• Strophe 1: Bedrückende Atmosphäre</li> <li>• Strophe 2: Trostlose Umgebung</li> <li>• Strophe 3: Positive Wendung: Jugend in der Stadt</li> </ul>                 | <p>In der ersten Strophe wird die Stadt mit einer bedrückenden Atmosphäre beschrieben, die schwer und düster wirkt. In der zweiten Strophe geht es um die trostlose und eintönige Umgebung der Stadt, in der kaum Natur zu finden ist. In der dritten Strophe gibt es jedoch eine positive Wendung, als das lyrische Ich sich an seine Jugend in dieser Stadt erinnert und damit eine Verbindung herstellt.</p>                                                                                                                                                                                                                                                                                                                                                                                                                                                                                                                                                                                                                                                                                                                                                                                          | <ul style="list-style-type: none"> <li>• In der ersten / zweiten / dritten / vierten (usw.) / nächsten / letzten Strophe...</li> <li>• Die erste / zweite / dritte / nächste / letzte Strophe...</li> <li>• Zu Beginn des lyrischen Textes... / Am Schluss des lyrischen Textes... beschreibt (das lyrische Ich) * werden...dargestellt * werden...verglichen * werden...gezeigt *</li> </ul>                                                                                                                                         |
| <p><b>Hauptteil 3 - Sprachliche Gestaltung</b></p>                                                                                                                                                                                                                                                             |                                                                                                                                                                                                            |                                                                                                                                                                                                                                                                                                                                                                                                                                                                                                                                                                                                                                                                                                                                                                                                                                                                                                                                                                                                                                                                                                                                                                                                          |                                                                                                                                                                                                                                                                                                                                                                                                                                                                                                                                       |
| <p><b>Sprachliche Mittel</b></p> <ul style="list-style-type: none"> <li>• Welche sprachlichen Mittel werden verwendet?</li> <li>• Welche Wirkung haben sie?</li> </ul> <p>Hinweis: Für sprachliche Mittel, die thematisiert werden, sollte eine Versangabe erfolgen (z.B. über eine Abkürzung: vgl. V.XX).</p> | <ul style="list-style-type: none"> <li>• 1. Strophe, V. 1: Parallelismus</li> <li>• 2. Strophe, V. 6: Onomatopoeikum</li> <li>• 2. Strophe, V 7: Metapher</li> <li>• 2. Strophe, V 8-9 Metapher</li> </ul> | <p>Zu Beginn der ersten Strophe wird ein Parallelismus verwendet: „Am grauen Strand, am grauen Meer“ (V. 1). Dieser verdeutlicht im Gedicht, wie das lyrische Ich die Eintönigkeit der Stadt wahrnimmt.</p> <p>In der zweiten Strophe des lyrischen Textes wird im ersten Vers ein Onomatopoeikum verwendet: „Es rauscht kein Wald, es schlägt im Mai“ (V. 6). Die Wörter "rauscht" und "schlägt" in Vers 6 sind Lautmalereien, also Wörter, die Geräusche nachahmen. In Kombination mit dem Wort "kein" wird die Eintönigkeit der Stadt betont, denn es "rauscht kein Wald," was bedeutet, dass es dort keine belebenden Naturgeräusche gibt.</p> <p>In der zweiten Strophe wird das Erwachen des Frühlings durch das Schlagen des Vogels im Mai "im Mai / kein Vogel ohn' Unterlass" (V. 7): metaphorisch dargestellt“. Eine weitere Metapher ist in den darauffolgenden Versen zu finden: "Die Wandergans mit hartem Schrei" (V. 8), "Nur fliegt in Herbstesnacht vorbei" (V. 9). Dass die Wandergans nur in den Herbstnächten vorbeifliegt, zeigt den Lesenden, dass das lyrische Ich den Herbst beschreibt. Der laute Ruf der Gans kann somit daher metaphorisch für den Herbst gesehen werden.</p> | <ul style="list-style-type: none"> <li>• Zu Beginn/In der ersten/zweiten/dritten Strophe des lyrischen Textes <ul style="list-style-type: none"> <li>○ wird (sprachliches Mittel nennen + Beispiel + Versangabe) angeführt/dargestellt</li> <li>○ folgt ein sprachliches Mittel „Beispiel“ + Versangabe. Dabei handelt es sich um eine*n (sprachliches Mittel nennen).</li> </ul> </li> <li>• Das sprachliche Mittel betont.....</li> <li>• Das sprachliche Mittel verdeutlicht....</li> <li>• Dadurch wird .... deutlich.</li> </ul> |
| <p><b>Wortwahl</b></p> <ul style="list-style-type: none"> <li>• Gibt es Wörter, die wiederholt werden? Erkennst du Schlüsselwörter?</li> </ul>                                                                                                                                                                 | <ul style="list-style-type: none"> <li>• Adjektive: V. 1, V. 12, V 15: grau 4x</li> </ul>                                                                                                                  | <p>In der ersten und letzten Strophe wiederholt sich das Farbadjektiv „grau“ (V. 1 und 14). Das Adjektiv "grau" betont, dass das lyrische Ich die Stadt als langweilig und farblos empfindet. Es verstärkt den Eindruck von Eintönigkeit und Traurigkeit. Es</p>                                                                                                                                                                                                                                                                                                                                                                                                                                                                                                                                                                                                                                                                                                                                                                                                                                                                                                                                         | <ul style="list-style-type: none"> <li>• In dem lyrischen Text dominieren Adjektive/Nomen/Verben (Beispiele + Verse nennen).</li> </ul>                                                                                                                                                                                                                                                                                                                                                                                               |

|                                                                                                                                                                |                                                                                                                                                                                                                        |                                                                                                                                                                                                                                                                                                                                                                                                                                                                                                                                                                                                                                                                                                                                                                        |                                                                                                                                                                                                                                                                                                                                                                                                                                                                                                                         |
|----------------------------------------------------------------------------------------------------------------------------------------------------------------|------------------------------------------------------------------------------------------------------------------------------------------------------------------------------------------------------------------------|------------------------------------------------------------------------------------------------------------------------------------------------------------------------------------------------------------------------------------------------------------------------------------------------------------------------------------------------------------------------------------------------------------------------------------------------------------------------------------------------------------------------------------------------------------------------------------------------------------------------------------------------------------------------------------------------------------------------------------------------------------------------|-------------------------------------------------------------------------------------------------------------------------------------------------------------------------------------------------------------------------------------------------------------------------------------------------------------------------------------------------------------------------------------------------------------------------------------------------------------------------------------------------------------------------|
| <ul style="list-style-type: none"> <li>• Werden bestimmte Wortarten (z.B. Nomen, Adjektive) bevorzugt?</li> <li>• Haben sie eine bestimmte Wirkung?</li> </ul> | <ul style="list-style-type: none"> <li>• Verben: „drückt“ (V. 3), „braust“ (V. 4), „rauscht“ (V. 6), „weht“ (V. 10)</li> <li>• Nomen: „Stadt“ (V. 1), „Meer“ (V. 1), „Nebel“ (V. 3), „Herbstesnacht“ (V. 9)</li> </ul> | <p>tauchen wiederkehrend Verben wie „drückt“ (V.3), „braust“ (V. 4), „rauscht“ (V.6) oder „weht“ (V. 10) auf, die die Umgebung in Bewegung erscheinen lassen. Sie beschreiben vor allem die Natur. Die Stadt wirkt klein und machtlos gegenüber den Kräften der Natur. In dem lyrischen Text dominieren außerdem Nomen wie "Strand" (V. 1), "Meer" (V. 1) "Nebel" (V. 3) und "Herbstesnacht" (V. 9). Diese zeigen, wo die Stadt liegt und welche Jahreszeit es ist. Diese Nomen tragen zu einer düsteren und kühlen Stimmung bei, die das Gefühl von Einsamkeit und Trostlosigkeit verstärkt.</p>                                                                                                                                                                      | <ul style="list-style-type: none"> <li>• Das Wort / Die Wörter (Beispiel + Versangabe) taucht im lyrischen Text wiederkehrend auf.</li> <li>• Dadurch wirkt der lyrische Text...</li> </ul>                                                                                                                                                                                                                                                                                                                             |
| <b>Schluss teil</b>                                                                                                                                            |                                                                                                                                                                                                                        |                                                                                                                                                                                                                                                                                                                                                                                                                                                                                                                                                                                                                                                                                                                                                                        |                                                                                                                                                                                                                                                                                                                                                                                                                                                                                                                         |
| <p><b>Zusammenfassender Abschlusssatz sowie persönliche Einschätzung</b></p>                                                                                   | <ul style="list-style-type: none"> <li>• Schlechte, aber auch gute Gefühle gegenüber der Heimat</li> <li>• Gefällt mir gut, in der Heimat viele Erinnerungen</li> </ul>                                                | <p>Insgesamt wird deutlich, dass Theodor Storm mit „Die Stadt“ ein Gedicht geschrieben hat, das die Stadt sowohl kritisch als auch liebevoll betrachtet. In den ersten beiden Strophen beschreibt er die negativen Seiten, wie die graue, trostlose Landschaft. In der dritten Strophe zeigt er jedoch, dass die Stadt trotz allem einen besonderen Platz im Herzen des lyrischen Ichs hat, weil sie Erinnerungen an die Jugend weckt.</p> <p>Mir persönlich gefällt das Gedicht gut, weil es zeigt, dass man seine Heimat lieben kann, selbst wenn sie nicht besonders schön oder aufregend ist. Die Beschreibung der Stadt ist zwar traurig und grau, aber trotzdem bedeutet sie dem lyrischen Ich viel, weil es dort wichtige Erinnerungen an seine Jugend hat.</p> | <ul style="list-style-type: none"> <li>• Insgesamt wird deutlich, dass in diesem Gedicht...</li> <li>• Zusammenfassend lässt sich sagen, dass das Gedicht...</li> <li>• Insgesamt stellt das Gedicht somit die (z.B. distanzierte * begeisterte * traurige) Grundhaltung des lyrischen Ich dar. Dies wird insbesondere durch die Metaphern/Vergleiche/... deutlich.</li> <li>• Mir persönlich gefällt das Gedicht/der lyrische Text gut/nicht so gut, denn ich kann nachvollziehen/nicht nachvollziehen, ...</li> </ul> |

## 16. Lehr-/Lernmaterialien für die Sprachbildung

### Aufgaben vor dem Lesen

1. *Lesen Sie die nachfolgenden Titel und Kurzbeschreibungen von Materialien für den sprachsensiblen Unterricht.*
  - a) Für diese Aufgabe gibt es zahlreiche individuelle Lösungen und es geht um Ihre persönliche Einschätzung. Ihre Antwort hängt z.B. davon ab, welche Fächer Sie studieren und wie groß Ihr Interesse am Thema Sprachbildung ist. Idealerweise können Sie sich über diese mit Kommiliton\*innen und/oder Kolleg\*innen austauschen, ggf. auch im Rahmen von universitären Seminarsitzungen.
  - b) Für diese Aufgabe gibt es zahlreiche Lösungen. Hinweise zu Auswahl- und Qualitätskriterien finden sich im Laufe des Kapitels. Notiert haben könnten Sie aber z.B.:
    - Passung zur Lerngruppe (Alter, Anforderungsniveau etc.)
    - Fachliche Angemessenheit
    - Passung zu Lehr-/Lernzielen und Rahmenbedingungen
    - (ansprechende) Gestaltung
    - ...

### Aufgaben nach dem Lesen

1. *Sehen Sie sich noch einmal die Kriterien an, die Sie vor dem Lesen des Kapitels notiert haben – können Sie nach der Lektüre des Kapitels noch weitere Kriterien ergänzen?*

Für diese Aufgabe gibt es individuelle Lösungen. Ggf. erweitern Sie also Ihre Notizen im Anschluss an die Lektüre des Kapitels um weitere Aspekte.

2. *Wählen Sie ein Lehr-/Lernmaterial aus den Tabellen im Text aus und recherchieren Sie dazu; z.B. sind im Internet i.d.R. das Inhaltsverzeichnis oder Probeseiten einsehbar. Können Sie sich vorstellen, mit dem Material zu arbeiten? Warum (nicht)?*

Für diese Aufgabe gibt es zahlreiche individuelle Lösungen. Idealerweise können Sie sich über diese mit Kommiliton\*innen und/oder Kolleg\*innen austauschen, ggf. auch im Rahmen von universitären Seminarsitzungen. Im besten Fall sind Sie auf ein Material gestoßen, das für Sie entweder für den Unterricht oder für das Fort-/Weiterbilden im Bereich Sprachbildung interessant ist.

3. *Nachfolgend finden Sie drei Fallbeispiele. Kolleg\*innen wenden sich an Sie mit Fragen zu passenden Lehr-/Lernmaterialien. Was würden Sie raten?*

Maak, Diana/ Petersen, Inger (2025): Sprachbildung in allen Schulfächern der Sekundarstufe. Grundlagen, Konzepte und Methoden der germanistischen Linguistik und Sprachdidaktik. De Gruyter.

*Beachten Sie für die Lösung auch die Liste mit Lehr-/Lernmaterialien (Begleitmaterial).*

*Bitte beachten Sie, dass regelmäßig neue Lehr-/Lernmaterialien auf den Markt kommen.*

*Es kann also sein, dass es bereits weitere bzw. passendere Lehr-/Lernmaterialien gibt und dementsprechend lohnt sich ggf. eine Online-Suche.*

Fall 1

Das Lehr-/Lernmaterial Schreiben in Biologie, Geschichte und Mathematik (Klasse 5/6 Pertzel & Schütte 2016, Klasse 7-10 Franken & Pertzel 2019) könnte für die Kollegin vielleicht geeignet sein.

Fall 2

Aktuell gibt es noch keine einschlägigen Einführungen für das Fach Informatik – der Kollege könnte entweder zu einer Einführung für Sprachbildung in den Naturwissenschaften (z.B. von Leisen) greifen oder aber eine Einführung lesen wie die von Beese et al. (2014) zu Sprachbildung in allen Fächern, weil diese zumindest auch die verschiedenen Fächergruppen berücksichtigt.

Fall 3

Es gibt einerseits die Reihe *Prima ankommen im Fachunterricht* mit Arbeitsbüchern, die auch Mathematik und Biologie berücksichtigen. Außerdem gibt es eine weitere Reihe, in der z.B. Mathematik mit DaZ-Schülern für verschiedene Altersstufen – in diesem Material finden sich vor allem Arbeitsblätter zur Wortschatzarbeit, die unterstützend eingesetzt werden können.

Maak, Diana/ Petersen, Inger (2025): Sprachbildung in allen Schulfächern der Sekundarstufe. Grundlagen, Konzepte und Methoden der germanistischen Linguistik und Sprachdidaktik. De Gruyter.

## 17. Literaturangaben

- Beese, Melanie, Claudia Benholz, Christoph Chlosta, Erkan Gürsoy, Beatrix Hinrichs, Constanze Niederhaus & Sven Oleschko (2014): Sprachbildung in allen Fächern (Deutsch lehren lernen 16). München: Klett-Langenscheidt.
- Berger, Markus, Margit Colditz, Peter Kirch, Thomas Michael, Jürgen Nebel, Notburga Protze & Dietrich Strohbach (2002): Heimat und Welt für Thüringen, Klasse 9 Regelschule. Braunschweig: Westermann.
- Dröse, Jennifer (2019): Textaufgaben lesen und verstehen lernen – Entwicklungsforschungsstudie zur mathematikspezifischen Leseverständnisförderung. Heidelberg: Springer Spektrum.
- Franken, Anna Ulrike & Eva Pertzelt (2019): Schreiben in Biologie, Geschichte und Mathematik (Klasse 7–10). Schriftlichkeit im sprachsensiblen Fachunterricht. Münster, New York: Waxmann.
- Heintze, Andreas (2010): Durchgängige Sprachbildung. Eine gemeinsame Aufgabe für jede Schule. Grundschulunterricht 4, 6–10.
- Krumm, Hans-Jürgen (2021): Sprachenpolitik Deutsch als Fremd- und Zweitsprache. Eine Einführung. Grundlagen Deutsch als Fremd- und Zweitsprache. Berlin: Erich Schmidt.
- Kurtz, Gunde, Nicole Hofmann, Britta Biermas, Tina Back & Karen Haseldiek (2014): Sprachintensiver Unterricht. Ein Handbuch. Baltmannsweiler: Schneider.
- Pandel, Hans-Jürgen (2015): Bildinterpretation. Die Bildquelle im Geschichtsunterricht. Bildinterpretation I. Schwalbach: Wochenschau.
- Pertzelt, Eva & Anna Ulrike Schütte (2016): Schreiben in Biologie, Geschichte und Mathematik (Klasse 5–6). Schriftlichkeit im sprachsensiblen Fachunterricht (Beiträge zur Schulentwicklung). Münster, New York: Waxmann.
- Reble, Raja & Inger Petersen (2021): Selbstwirksamkeitserwartungen von Lehramtsstudierenden zum Umgang mit sprachlicher Heterogenität – Entwicklung, Erprobung und Evaluation einer Kurzska. In Anna-Lena Scherger, Beate Lütke, Elke Montanari, Anja Müller & Julia Ricart Brede (Hrsg.), Deutsch als Zweitsprache – Forschungsfelder und Ergebnisse, 75–95. Stuttgart: Fillibach bei Klett.
- Thürmann, Eike & Helmut Johannes Vollmer (2013): Schulsprache und Sprachsensibler Fachunterricht: Eine Checkliste mit Erläuterungen. In Charlotte Röhner & Britta Hövelbrinks (Hrsg.), Fachbezogene Sprachförderung in Deutsch als Zweitsprache. Theoretische Konzepte und empirische Befunde zum Erwerbbildungssprachlicher Kompetenzen, 212–233. Weinheim, Basel: Beltz Juventa.
